# Supplementary material for: Theoretical investigation of the chiral transition of serine and the roles of water, hydroxyl radical and hydroxide ion
Source: Royal Society of Chemistry journal article supplement (doi:10.1039/c9nj01796h), 2019-01-01
Supplement: c9nj01796h1.pdf [file c9nj01796h1.pdf]

## Electronic supplementary information

# Theoretical Investigations of the Chiral Transition of Serine and the Role of Water, Hydroxyl Radical and Hydroxide Ion

*Hua Tong, †<sup>a</sup> Yan Fang Liu, †<sup>\*b</sup> Honyan Yan,<sup>c</sup> Chunxu jiang,<sup>a</sup> Feng Gao,<sup>a</sup> Zemin Mei,<sup>d</sup> Kun*

*Hong,<sup>b</sup> Xiaocui Yang,<sup>\*a</sup> Zuocheng Wang<sup>\*a</sup>*

<sup>a</sup> The Department of Physics; The institute of theoretical and computational research, Baicheng Normal University, Baicheng 137000, China.

E-mail: tonghua699@126.com    yxc0622@163.com

<sup>b</sup> National & Local Joint Engineering Research Center for Mineral Salt Deep Utilization, Key Laboratory for Palygorskite Science and Applied Technology of Jiangsu Province, Huaiyin Institute of Technology, Huaian 223003, China; Shandong Provincial Key Laboratory of Synthetic Biology, Laboratory of Biofuels, Qingdao Institute of Bioenergy and Bioprocess Technology, Chinese Academy of Sciences, Qingdao, 266061, China. E-mail: liu\_yf@qibebt.ac.cn ; Tel: +86-532-80662793

<sup>c</sup>Department of Computer Science, Baicheng Normal University, Baicheng 137000, China.

<sup>d</sup>Department of Chemistry, Baicheng Normal University, Baicheng 137000, China.

† These authors made equal contributions to this work.

Table S1. The high level Energy (E) at gas phase, Thermal correction to Gibbs Free Energy (Gtc), total energies ( $G_{total}$ , including the ZPE correction) and relative total energies ( $\Delta G_{total}$ ), transition state imaginary frequency (Ima) at 298.15 K of all stationary points in the each reaction pathway of **S\_1<sup>A</sup>** chiral transition **R\_1<sup>A</sup>**.

| Structures                | Gtc(Hartree) | E(Hartree) | $G_{total}$ (Hartree) | $\Delta G_{total}$ (Kcal mol <sup>-1</sup> ) | Ima (cm <sup>-1</sup> ) |
|---------------------------|--------------|------------|-----------------------|----------------------------------------------|-------------------------|
| <b>S_1<sup>A</sup></b>    | 0.08153      | -398.29013 | -398.20860            | 0.00                                         |                         |
| <b>S_TS1<sup>A</sup></b>  | 0.08001      | -398.28279 | -398.20278            | 3.66                                         | 530.32                  |
| <b>S_2<sup>A</sup></b>    | 0.08066      | -398.28512 | -398.20446            | 2.60                                         |                         |
| <b>TS2<sup>A</sup></b>    | 0.07552      | -398.18642 | -398.11090            | 61.37                                        | 1706.62                 |
| <b>3<sup>A</sup></b>      | 0.08121      | -398.24070 | -398.15949            | 30.85                                        |                         |
| <b>Pathway A1</b>         |              |            |                       |                                              |                         |
| <b>TS3<sup>A1</sup></b>   | 0.08055      | -398.23732 | -398.15677            | 32.55                                        | 307.79                  |
| <b>4<sup>A1</sup></b>     | 0.08098      | -398.23898 | -398.15800            | 31.78                                        |                         |
| <b>TS4<sup>A1</sup></b>   | 0.08042      | -398.23107 | -398.15065            | 36.40                                        | 151.89                  |
| <b>5<sup>A1</sup></b>     | 0.08098      | -398.23898 | -398.15800            | 31.78                                        |                         |
| <b>TS5<sup>A1</sup></b>   | 0.07537      | -398.18472 | -398.10935            | 62.34                                        | 1703.54                 |
| <b>R_6<sup>A1</sup></b>   | 0.08059      | -398.28769 | -398.20710            | 0.94                                         |                         |
| <b>R_TS6<sup>A1</sup></b> | 0.08039      | -398.28645 | -398.20606            | 1.60                                         | 230.00                  |
| <b>R_1<sup>A1</sup></b>   | 0.08153      | -398.29013 | -398.20860            | 0.00                                         |                         |
| <b>Pathway A2</b>         |              |            |                       |                                              |                         |
| <b>TS3<sup>A2</sup></b>   | 0.07528      | -398.18511 | -398.10983            | 62.04                                        | 1703.50                 |
| <b>R_4<sup>A2</sup></b>   | 0.08067      | -398.28577 | -398.2051             | 2.20                                         |                         |
| <b>R_TS4<sup>A2</sup></b> | 0.07933      | -398.27905 | -398.19972            | 5.58                                         | 589.15                  |
| <b>R_5<sup>A2</sup></b>   | 0.08036      | -398.28411 | -398.20375            | 3.05                                         |                         |
| <b>R_TS5<sup>A2</sup></b> | 0.08016      | -398.28359 | -398.20343            | 3.25                                         | 237.77                  |
| <b>R_6<sup>A2</sup></b>   | 0.08036      | -398.28534 | -398.20498            | 2.27                                         |                         |
| <b>R_TS6<sup>A2</sup></b> | 0.08040      | -398.28483 | -398.20443            | 2.62                                         | 218.04                  |
| <b>R_1<sup>A2</sup></b>   | 0.08128      | -398.29074 | -398.20946            | -0.53                                        |                         |

Table S2. The geometric parameters of S\_1<sup>A</sup> and R\_1<sup>A1</sup>.

| Structures        | C1-N5 | C1-C8 | C1-C3 | C3-O13 | C8-O9 | C8-O10 |
|-------------------|-------|-------|-------|--------|-------|--------|
| S_1 <sup>A</sup>  | 1.46  | 1.52  | 1.55  | 1.41   | 1.21  | 1.35   |
| R_1 <sup>A1</sup> | 1.46  | 1.52  | 1.55  | 1.41   | 1.21  | 1.35   |

| Structures        | ∠C3-C1-C8 | ∠C1-N5-H6 | ∠C1-C8-O9 | ∠O9-C8-O10 |
|-------------------|-----------|-----------|-----------|------------|
| S_1 <sup>A</sup>  | 111.9     | 111.9     | 125.0     | 122.9      |
| R_1 <sup>A1</sup> | 111.9     | 111.9     | 125.0     | 122.9      |

| Structures        | ∠H12-C1-N5-H7 | ∠C3-C1-C8-O9 | ∠C8-O9-O10-H11 |
|-------------------|---------------|--------------|----------------|
| S_1 <sup>A</sup>  | -24.6         | 117.8        | 178.3          |
| R_1 <sup>A1</sup> | 24.6          | -117.8       | -178.3         |

Table S3. The high level Energy (E) at gas phase, Thermal correction to Gibbs Free Energy (Gtc), total energies ( $G_{total}$ , including the ZPE correction) and relative total energies ( $\Delta G_{total}$ ), transition state imaginary frequency (Ima) at 298.15 K of all stationary points in the each reaction channel of **S\_1<sup>B</sup>** chiral transition **R\_1<sup>B</sup>**.

| Structures                | Gtc(Hartree) | E(Hartree) | $G_{total}$ (Hartree) | $\Delta G_{total}$ (Kcal mol <sup>-1</sup> ) | Ima (cm <sup>-1</sup> ) |
|---------------------------|--------------|------------|-----------------------|----------------------------------------------|-------------------------|
| <b>S_1<sup>B</sup></b>    | 0.08194      | -398.29141 | -398.20947            | 0.00                                         |                         |
| <b>S_TS1<sup>B</sup></b>  | 0.07982      | -398.26809 | -398.18827            | 13.32                                        | 539.83                  |
| <b>S_2<sup>B</sup></b>    | 0.08104      | -398.28413 | -398.20309            | 4.01                                         |                         |
| <b>TS2<sup>B</sup></b>    | 0.07517      | -398.18239 | -398.10722            | 64.22                                        | 1685.36                 |
| <b>3<sup>B</sup></b>      | 0.08104      | -398.23303 | -398.15199            | 36.10                                        |                         |
| <b>Pathway B1</b>         |              |            |                       |                                              |                         |
| <b>TS3<sup>B1</sup></b>   | 0.08035      | -398.22981 | -398.14946            | 37.69                                        | 282.33                  |
| <b>4<sup>B1</sup></b>     | 0.08069      | -398.23106 | -398.15037            | 37.12                                        |                         |
| <b>TS4<sup>B1</sup></b>   | 0.07794      | -398.22365 | -398.14571            | 40.05                                        | 163.34                  |
| <b>5<sup>B1</sup></b>     | 0.08069      | -398.23106 | -398.15037            | 37.12                                        |                         |
| <b>TS5<sup>B1</sup></b>   | 0.07515      | -398.18026 | -398.10511            | 65.55                                        | 1685.20                 |
| <b>R_6<sup>B1</sup></b>   | 0.08055      | -398.28619 | -398.20564            | 2.41                                         |                         |
| <b>R_TS6<sup>B1</sup></b> | 0.08041      | -398.28554 | -398.20513            | 2.73                                         | 201.95                  |
| <b>R_7<sup>B1</sup></b>   | 0.08154      | -398.28887 | -398.20733            | 1.34                                         |                         |
| <b>R_TS7<sup>B1</sup></b> | 0.08028      | -398.28166 | -398.20138            | 5.08                                         | 581.04                  |
| <b>R_8<sup>B1</sup></b>   | 0.08156      | -398.28670 | -398.20514            | 2.72                                         |                         |
| <b>R_TS8<sup>B1</sup></b> | 0.08017      | -398.27019 | -398.19002            | 12.22                                        | 605.12                  |
| <b>R_1<sup>B1</sup></b>   | 0.08194      | -398.29141 | -398.20947            | 0.00                                         |                         |
| <b>Pathway B2</b>         |              |            |                       |                                              |                         |
| <b>TS3<sup>B2</sup></b>   | 0.07496      | -398.18095 | -398.10599            | 65.00                                        | 1684.38                 |
| <b>R_4<sup>B2</sup></b>   | 0.08035      | -398.28382 | -398.20347            | 3.77                                         |                         |
| <b>R_TS4<sup>B2</sup></b> | 0.07885      | -398.26599 | -398.18714            | 14.03                                        | 576.12                  |
| <b>R_1<sup>B2</sup></b>   | 0.08189      | -398.28873 | -398.20684            | 1.65                                         |                         |
| <b>Pathway B3</b>         |              |            |                       |                                              |                         |
| <b>TS3<sup>B3</sup></b>   | 0.07733      | -398.17279 | -398.09546            | 71.61                                        | 1657.50                 |
| <b>R_1<sup>B3</sup></b>   | 0.08088      | -398.28817 | -398.20729            | 1.37                                         |                         |

Table S4. The high level Energy (E), Thermal correction to Gibbs Free Energy (Gtc), total energies ( $G_{total}$ , including the ZPE correction) and relative total energies ( $\Delta G_{total}$ ), transition state imaginary frequency (Ima) at 298.15 K of all stationary points in the water-mediated proton transfer reactions for pathway **A1** at gas phase and solvent phase, respectively.

| Structures                              | Gtc(Hartree) | E(Hartree) | $G_{total}$ (Hartree) | $\Delta G_{total}$ (Kcal mol <sup>-1</sup> ) | Ima (cm <sup>-1</sup> ) |
|-----------------------------------------|--------------|------------|-----------------------|----------------------------------------------|-------------------------|
| <b>gas phase</b>                        |              |            |                       |                                              |                         |
| <b>S_2<sup>A1</sup>·2H<sub>2</sub>O</b> | 0.12130      | -550.95585 | -550.83455            | 0.00                                         |                         |
| <b>TS'2<sup>A1</sup></b>                | 0.12143      | -550.90649 | -550.78506            | 31.09                                        | 769.77                  |
| <b>3<sup>A1</sup>·2H<sub>2</sub>O</b>   | 0.12481      | -550.91979 | -550.79498            | 24.85                                        |                         |
| <b>5<sup>A1</sup>·2H<sub>2</sub>O</b>   | 0.12458      | -550.91913 | -550.79455            | 0.00                                         |                         |
| <b>TS'5<sup>A1</sup></b>                | 0.12144      | -550.90704 | -550.7856             | 5.62                                         | 797.20                  |
| <b>R_6<sup>A1</sup>·2H<sub>2</sub>O</b> | 0.12159      | -550.95459 | -550.833              | -24.15                                       |                         |
| <b>solvent phase</b>                    |              |            |                       |                                              |                         |
| <b>S_2<sup>A1</sup>·2H<sub>2</sub>O</b> | 0.12130      | -550.98499 | -550.86369            | 0.00                                         |                         |
| <b>TS'2<sup>A1</sup></b>                | 0.12143      | -550.94312 | -550.82169            | 26.38                                        | 769.77                  |
| <b>3<sup>A1</sup>·2H<sub>2</sub>O</b>   | 0.12481      | -550.95417 | -550.82936            | 21.56                                        |                         |
| <b>5<sup>A1</sup>·2H<sub>2</sub>O</b>   | 0.12458      | -550.95257 | -550.82799            | 0.00                                         |                         |
| <b>TS'5<sup>A1</sup></b>                | 0.12144      | -550.94187 | -550.82043            | 4.75                                         | 797.20                  |
| <b>R_6<sup>A1</sup>·2H<sub>2</sub>O</b> | 0.12159      | -550.98294 | -550.86135            | -20.95                                       |                         |

Table S5. The high level Energy (E), Thermal correction to Gibbs Free Energy (Gtc), total energies ( $G_{total}$ , including the ZPE correction) and relative total energies ( $\Delta G_{total}$ ), transition state imaginary frequency (Ima) at 298.15 K of all stationary points in the hydroxyl radical -mediated proton transfer reactions for pathway A1 at gas phase and solvent phase, respectively.

| Structures                                   | Gtc(Hartree) | E(Hartree) | $G_{total}$ (Hartree) | $\Delta G_{total}$ (Kcal mol <sup>-1</sup> ) | Ima (cm <sup>-1</sup> ) |
|----------------------------------------------|--------------|------------|-----------------------|----------------------------------------------|-------------------------|
| <b>gas phase</b>                             |              |            |                       |                                              |                         |
| <b>S_2<sup>A1</sup>·(H<sub>2</sub>O·OH·)</b> | 0.10713      | -550.25183 | -550.14470            | 0.00                                         |                         |
| <b>TS''2<sup>A1</sup></b>                    | 0.10685      | -550.20172 | -550.09487            | 31.30                                        | 988.25                  |
| <b>3<sup>A1</sup>·(H<sub>2</sub>O·OH·)</b>   | 0.10978      | -550.21352 | -550.10374            | 25.73                                        |                         |
| <b>5<sup>A1</sup>·(H<sub>2</sub>O·OH·)</b>   | 0.10978      | -550.21352 | -550.10374            | 0.00                                         |                         |
| <b>TS''5<sup>A1</sup></b>                    | 0.10702      | -550.20234 | -550.09532            | 5.29                                         | 1001.40                 |
| <b>R_6<sup>A1</sup>·(H<sub>2</sub>O·OH·)</b> | 0.10755      | -550.25247 | -550.14492            | -25.87                                       |                         |
| <b>solvent phase</b>                         |              |            |                       |                                              |                         |
| <b>S_2<sup>A1</sup>·(H<sub>2</sub>O·OH·)</b> | 0.10713      | -550.21700 | -550.10987            | 0.00                                         |                         |
| <b>TS''2<sup>A1</sup></b>                    | 0.10685      | -550.19663 | -550.08978            | 12.62                                        | 988.25                  |
| <b>3<sup>A1</sup>·(H<sub>2</sub>O·OH·)</b>   | 0.10978      | -550.24913 | -550.13935            | -18.52                                       |                         |
| <b>5<sup>A1</sup>·(H<sub>2</sub>O·OH·)</b>   | 0.10978      | -550.24913 | -550.13935            | 0.00                                         |                         |
| <b>TS''5<sup>A1</sup></b>                    | 0.10702      | -550.19555 | -550.08853            | 31.92                                        | 1001.40                 |
| <b>R_6<sup>A1</sup>·(H<sub>2</sub>O·OH·)</b> | 0.10755      | -550.21596 | -550.10841            | 19.43                                        |                         |

**Fig. S1** Intrinsic reaction coordinate for the proton transfer process from C1 to O19, from O19 to O16, from O16 to N5 atoms of  $3^{A1} \cdot (\text{H}_2\text{O} \cdot \text{OH} \cdot)$ .

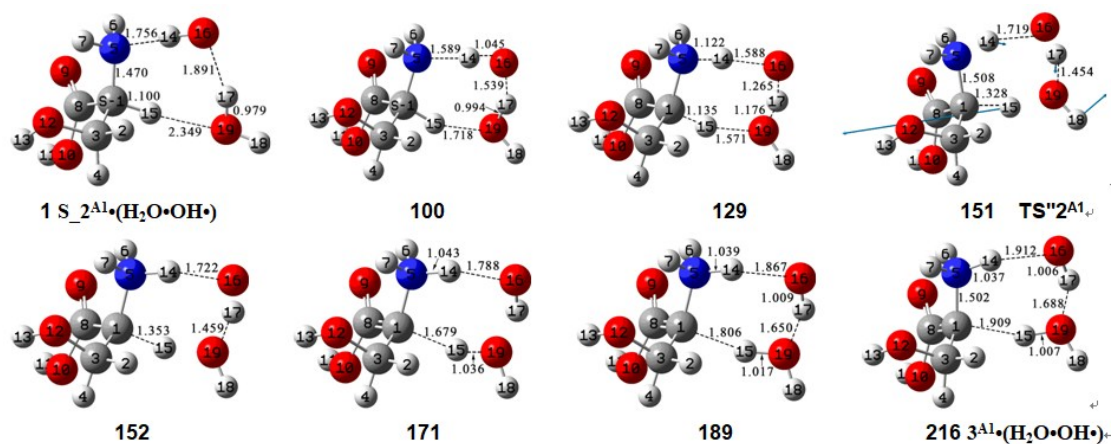

**Fig.S2** The geometries of some states for this  $\text{S}_{2\text{A1}}(\text{H}_2\text{O} \cdot \text{OH} \cdot) \rightarrow \text{TS}''_{2\text{A1}} \rightarrow 3^{\text{A1}}(\text{H}_2\text{O} \cdot \text{OH} \cdot)$  process.

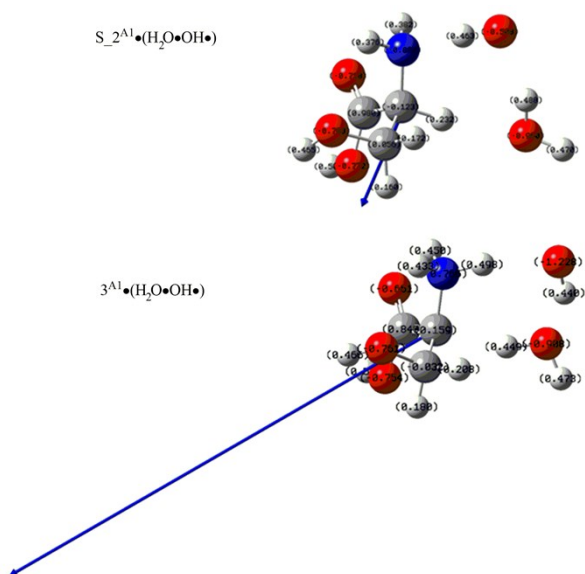

**Fig.S3** the NBO charge and the dipole moment of  $S_{2A1}\bullet(H_2O\bullet OH\bullet)$  and  $3A1\bullet(H_2O\bullet OH\bullet)$

As shown in calculated free-energy profile in Fig.9, this step is very endothermic from  $S_{2A1}\bullet(H_2O\bullet OH\bullet)$  to  $3A1\bullet(H_2O\bullet OH\bullet)$ , by  $25.7 \text{ kcal mol}^{-1}$ . One reason is the NBO charges of oxygen atom  $OH\bullet$  and  $\alpha$ -carbon change from  $-0.508$  and  $-0.123$  to  $-1.228$  and  $0.159$  a.u., respectively. The electronegativity on carboxyl oxygen and hydroxyl oxygen is also reduced, which make the dipole moment of the system to increase from  $3.0920 \text{ cm}$  to  $12.9459 \text{ cm}$ , resulting in the degree of charge separation is significantly increased. Another reason is carbon center undergoes a hybridization change from  $sp^3$  to  $sp^2$  in the transition state from  $S_{2A1}\bullet(H_2O\bullet OH\bullet)$  to  $3A1\bullet(H_2O\bullet OH\bullet)$ . However, when considered the solvation of the water environment, the  $3A1\bullet(H_2O\bullet OH\bullet)$  is stable than the  $S_{2A1}\bullet(H_2O\bullet OH\bullet)$ , by  $18.5 \text{ kcal mol}^{-1}$ . The reason may be caused by the dipole moment of  $3A1\bullet(H_2O\bullet OH\bullet)$  is the bigger than that of  $S_{2A1}\bullet(H_2O\bullet OH\bullet)$ , and the strong polar water solvent reduces the energy of the  $3A1\bullet(H_2O\bullet OH\bullet)$  significantly more than that of the  $S_{2A1}\bullet(H_2O\bullet OH\bullet)$ .

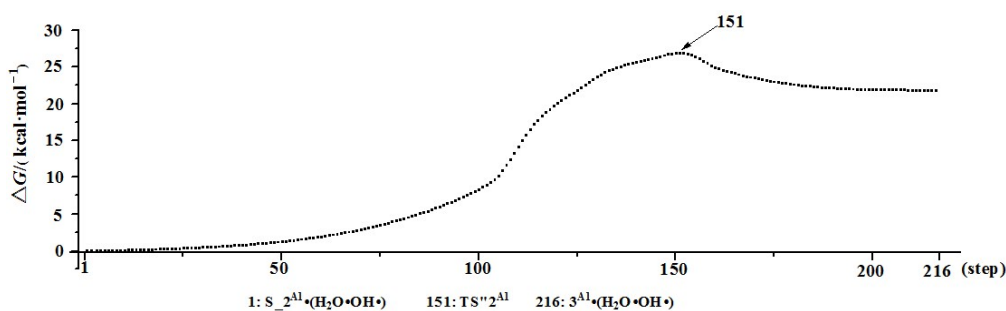



Table S6. The high level Energy (E), Thermal correction to Gibbs Free Energy (Gtc), total energies ( $G_{total}$ , including the ZPE correction) and relative total energies ( $\Delta G_{total}$ ), transition state imaginary frequency (Ima) at 298.15 K of all stationary points in the hydroxide ion mediated proton transfer reactions for pathway **A1** at gas phase and solvent phase, respectively.

| Structures                                  | Gtc(Hartree) | E(Hartree) | $G_{total}$ (Hartree) | $\Delta G_{total}$ (kcal/mol) | Ima (cm <sup>-1</sup> ) |
|---------------------------------------------|--------------|------------|-----------------------|-------------------------------|-------------------------|
| <b>gas phase</b>                            |              |            |                       |                               |                         |
| <b>S_2<sup>A1</sup>·(H<sub>2</sub>O·OH)</b> | 0.10500      | -550.37091 | -550.26591            | 0.0                           |                         |
| <b>TS'''2<sup>A1</sup></b>                  | 0.10580      | -550.36943 | -550.26363            | 1.4                           | 216.93                  |
| <b>3''<sup>A1</sup>·2H<sub>2</sub>O</b>     | 0.10774      | -550.38647 | -550.27873            | -8.1                          |                         |
| <b>5'<sup>A1</sup>·2H<sub>2</sub>O</b>      | 0.10774      | -550.38647 | -550.27873            | 0.0                           |                         |
| <b>TS'''5<sup>A1</sup></b>                  | 0.10580      | -550.36943 | -550.26363            | 9.5                           | 216.92                  |
| <b>R_6<sup>A1</sup>·(H<sub>2</sub>O·OH)</b> | 0.10500      | -550.37091 | -550.26591            | 8.1                           |                         |
| <b>solvent phase</b>                        |              |            |                       |                               |                         |
| <b>S_2<sup>A1</sup>·(H<sub>2</sub>O·OH)</b> | 0.10500      | -550.48423 | -550.37923            | 0.0                           |                         |
| <b>TS'''2<sup>A1</sup></b>                  | 0.10580      | -550.47628 | -550.37048            | 5.5                           | 216.93                  |
| <b>3''<sup>A1</sup>·2H<sub>2</sub>O</b>     | 0.10774      | -550.48534 | -550.3776             | 1.0                           |                         |
| <b>5'<sup>A1</sup>·2H<sub>2</sub>O</b>      | 0.10774      | -550.48534 | -550.3776             | 0.0                           |                         |
| <b>TS'''5<sup>A1</sup></b>                  | 0.10580      | -550.47628 | -550.37048            | 4.5                           | 216.92                  |
| <b>R_6<sup>A1</sup>·(H<sub>2</sub>O·OH)</b> | 0.10500      | -550.48423 | -550.37923            | -1.0                          |                         |

Table S7. The high level Energy (E), Thermal correction to Gibbs Free Energy (Gtc), total energies ( $G_{total}$ , including the ZPE correction) and relative total energies ( $\Delta G_{total}$ ), transition state imaginary frequency (Ima) at 298.15 K of all stationary points in the water-mediated proton transfer reactions for pathway B1 at gas phase and solvent phase, respectively.

| Structures                              | Gtc(Hartree) | E(Hartree) | $G_{total}$ (Hartree) | $\Delta G_{total}$ (Kcal mol <sup>-1</sup> ) | Ima (cm <sup>-1</sup> ) |
|-----------------------------------------|--------------|------------|-----------------------|----------------------------------------------|-------------------------|
| <b>gas phase</b>                        |              |            |                       |                                              |                         |
| <b>S_2<sup>B1</sup>·2H<sub>2</sub>O</b> | 0.12210      | -550.95614 | -550.83404            | 0.00                                         |                         |
| <b>TS'2<sup>B1</sup></b>                | 0.12103      | -550.90333 | -550.78230            | 32.50                                        | 858.23                  |
| <b>3<sup>B1</sup>·2H<sub>2</sub>O</b>   | 0.12437      | -550.91467 | -550.79033            | 27.46                                        |                         |
| <b>5<sup>B1</sup>·2H<sub>2</sub>O</b>   | 0.12429      | -550.91334 | -550.78911            | 0.00                                         |                         |
| <b>TS'5<sup>B1</sup></b>                | 0.12093      | -550.90246 | -550.78153            | 4.76                                         | 862.47                  |
| <b>R_6<sup>B1</sup>·2H<sub>2</sub>O</b> | 0.12110      | -550.95418 | -550.83308            | -27.62                                       |                         |
| <b>solvent phase</b>                    |              |            |                       |                                              |                         |
| <b>S_2<sup>B1</sup>·2H<sub>2</sub>O</b> | 0.12210      | -550.98377 | -550.86167            | 0.00                                         |                         |
| <b>TS'2<sup>B1</sup></b>                | 0.12103      | -550.94053 | -550.81950            | 26.49                                        | 858.23                  |
| <b>3<sup>B1</sup>·2H<sub>2</sub>O</b>   | 0.12437      | -550.95161 | -550.82724            | 21.63                                        |                         |
| <b>5<sup>B1</sup>·2H<sub>2</sub>O</b>   | 0.12429      | -550.94971 | -550.82542            | 0.00                                         |                         |
| <b>TS'5<sup>B1</sup></b>                | 0.12093      | -550.93848 | -550.81755            | 4.94                                         | 862.47                  |
| <b>R_6<sup>B1</sup>·2H<sub>2</sub>O</b> | 0.12110      | -550.98322 | -550.86211            | -23.05                                       |                         |

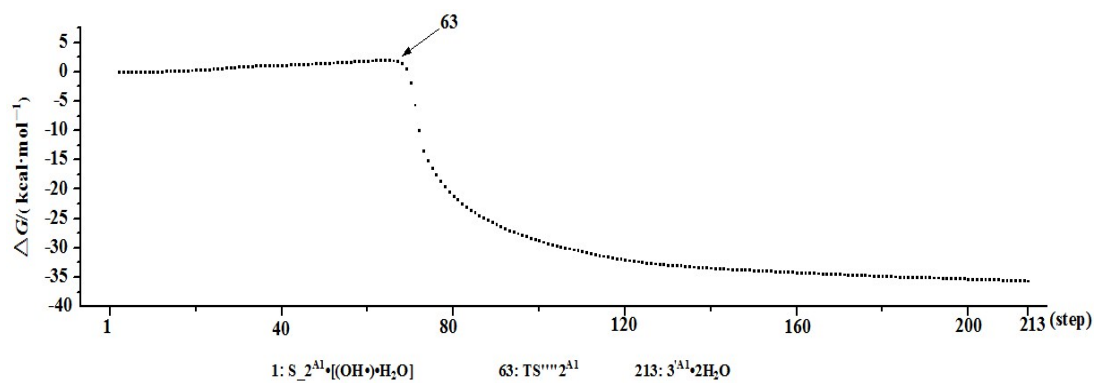

Fig. S4 Intrinsic reaction coordinate for the proton transfer process from C1 to O19 of  $3^{A1}\cdot 2H_2O$ .

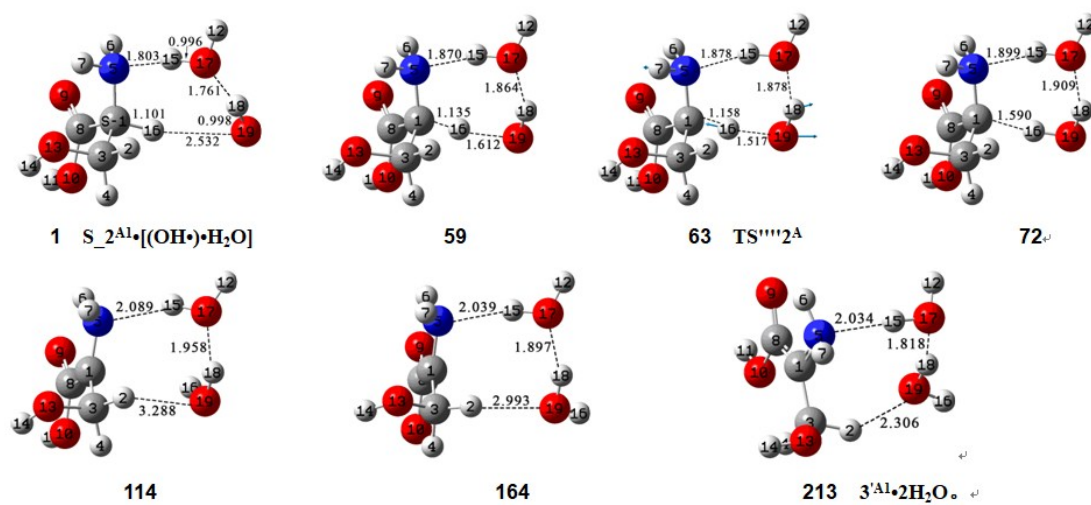

Fig.S5 The geometries of some states for this  $S_2^{A1}\cdot[(OH)\cdot H_2O]\rightarrow TS''''2^{A1}\rightarrow 3^{A1}\cdot 2H_2O$  process

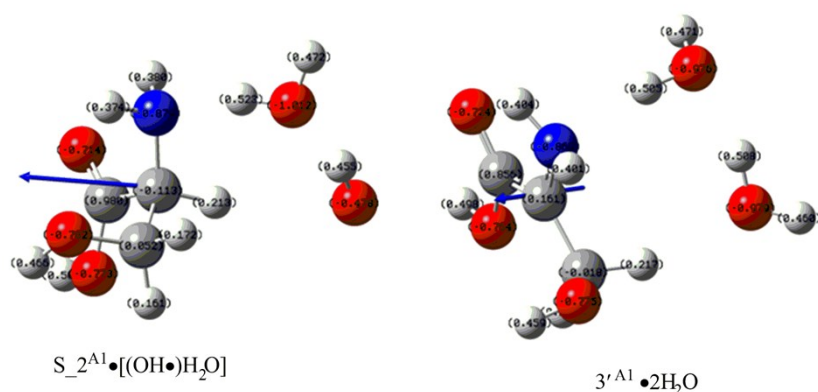

**Fig.S6** the NBO charge and the dipole moment of  $S_2^{A1} \cdot [(OH\bullet)H_2O]$  and  $3'^{A1} \cdot 2H_2O$

However, from  $S_2^{A1} \cdot [(OH\bullet)H_2O]$  to  $3'^{A1} \cdot 2H_2O$ ,  $3'^{A1} \cdot 2H_2O$  is more stable than  $S_2^{A1} \cdot (H_2O \cdot OH\bullet)$  in gas phase, by  $37.6 \text{ kcal mol}^{-1}$  (Fig.9), one reason is the NBO charges of oxygen atom of water molecular and carbon change from -1.012 and -0.113 to -0.976 and 0.161 a.u. and the electrical properties of methylene carbon changes from positively to negatively charged, resulting in the dipole moment of the system decrease from 2.6600 cm to 1.7762 cm, and the charge separation is reduced. Another reason is the skeleton atoms 1C, 3C, 8C, 5N, 9O, 10O and 13O form a super-conjugated large  $\pi$  bond in  $3'^{A1}$ , and there are Intermolecular hydrogen bonds in  $3'^{A1} \cdot 2H_2O$ . When considered the water solvation, the stability is hardly changed, the reason may be the dipole moment of  $3'^{A1} \cdot 2H_2O$  and  $S_2^{A1} \cdot [(OH\bullet)H_2O]$  are small, and the difference of both dipole moments is small.

Table S8. The high level Energy (E), Thermal correction to Gibbs Free Energy (Gtc), total energies ( $G_{total}$ , including the ZPE correction) and relative total energies ( $\Delta G_{total}$ ), transition state imaginary frequency (Ima) at 298.15 K of all stationary points in the hydroxyl radical catalysed serine damage reactions for pathway **A1** at gas phase and solvent phase, respectively.

| Structures                                  | Gtc(Hartree) | E(Hartree) | $G_{total}$ (Hartree) | $\Delta G_{total}$ (Kcal mol <sup>-1</sup> ) | Ima (cm <sup>-1</sup> ) |
|---------------------------------------------|--------------|------------|-----------------------|----------------------------------------------|-------------------------|
| <b>gas phase</b>                            |              |            |                       |                                              |                         |
| S_2 <sup>A1</sup> ·[(OH·)·H <sub>2</sub> O] | 0.10764      | -550.25103 | -550.14399            | 0.00                                         |                         |
| TS'''' <sup>A1</sup>                        | 0.10779      | -550.19134 | -550.08355            | 37.96                                        | 791.41                  |
| 3' <sup>A1</sup> ·2H <sub>2</sub> O         | 0.10784      | -550.31109 | -550.20325            | -37.22                                       |                         |
| <b>solvent phase</b>                        |              |            |                       |                                              |                         |
| S_2 <sup>A1</sup> ·[(OH·)·H <sub>2</sub> O] | 0.10764      | -550.28018 | -550.17254            | 0.00                                         |                         |
| TS'''' <sup>A1</sup>                        | 0.10779      | -550.24184 | -550.13405            | 24.18                                        | 791.41                  |
| 3' <sup>A1</sup> ·2H <sub>2</sub> O         | 0.10784      | -550.34326 | -550.23542            | -39.50                                       |                         |

**Cartesian coordinates of stationary points optimized at the  
B3LYP/6-31+G(d, p) level**

**S\_1<sup>A</sup>**

|   |             |             |             |
|---|-------------|-------------|-------------|
| C | -0.26295500 | 0.32611400  | 0.68393400  |
| H | -2.19291700 | -0.56351700 | 1.04295200  |
| C | -1.31584600 | -0.77103700 | 0.40963300  |
| H | -0.92764900 | -1.75838500 | 0.66836500  |
| N | -0.77130800 | 1.60073600  | 0.17665800  |
| H | -0.02457900 | 2.14957000  | -0.24120000 |
| H | -1.22399400 | 2.14617600  | 0.90145100  |
| C | 1.06847700  | 0.01725200  | 0.00969300  |
| O | 1.67331500  | 0.77903700  | -0.71549200 |
| O | 1.53425600  | -1.20584800 | 0.34145700  |
| H | 2.37969900  | -1.33036500 | -0.12221000 |
| H | -0.05509000 | 0.33723100  | 1.76640000  |
| O | -1.66766400 | -0.79278000 | -0.95914000 |
| H | -1.81363300 | 0.13688600  | -1.20652700 |

**S\_TS1<sup>A</sup>**

|   |             |             |             |
|---|-------------|-------------|-------------|
| C | 0.27048100  | 0.32629100  | -0.71168100 |
| H | 2.19933200  | -0.59825700 | -0.99331000 |
| C | 1.29108400  | -0.79798600 | -0.40255700 |
| H | 0.89202100  | -1.76958600 | -0.70365500 |
| N | 0.73419200  | 1.62833100  | -0.31721500 |
| H | 0.28722200  | 2.09012900  | 0.45806100  |
| H | 1.60716000  | 1.98578500  | -0.66372500 |
| C | -1.04709800 | 0.05412800  | 0.00233200  |
| O | -1.52738800 | 0.74761700  | 0.87293200  |
| O | -1.63675800 | -1.07571700 | -0.44835900 |
| H | -2.44829800 | -1.20539200 | 0.07098800  |
| H | 0.05729500  | 0.27694900  | -1.79205700 |
| O | 1.58836000  | -0.88292000 | 0.97908100  |
| H | 1.78541900  | 0.01561800  | 1.28640200  |

**S\_2<sup>A</sup>**

|   |            |            |             |
|---|------------|------------|-------------|
| C | 0.26788100 | 0.36543500 | -0.70758400 |
|---|------------|------------|-------------|

|   |             |             |             |
|---|-------------|-------------|-------------|
| H | 2.21537800  | -0.52423200 | -0.97754300 |
| C | 1.28744700  | -0.76841100 | -0.43649000 |
| H | 0.90440200  | -1.71447400 | -0.82713800 |
| N | 0.70973800  | 1.69770600  | -0.32663800 |
| H | 0.44786800  | 1.93604200  | 0.62445500  |
| H | 1.69632400  | 1.85919700  | -0.49311700 |
| C | -1.03629800 | 0.06520600  | 0.01725200  |
| O | -1.45138900 | 0.66697300  | 0.98368100  |
| O | -1.68439700 | -0.98723300 | -0.53158700 |
| H | -2.47609900 | -1.15325900 | 0.00793600  |
| H | 0.05419200  | 0.33960100  | -1.78565400 |
| O | 1.53938300  | -0.98496000 | 0.94266200  |
| H | 1.84680500  | -0.15843600 | 1.34040900  |

### TS2<sup>A</sup>

|   |             |             |             |
|---|-------------|-------------|-------------|
| C | 0.17499100  | 0.30145500  | -0.52430000 |
| H | 2.16925100  | -0.12403000 | -1.20143800 |
| C | 1.40793900  | -0.53721400 | -0.53229100 |
| H | 1.14961800  | -1.53652300 | -0.89768000 |
| N | 0.44342400  | 1.78811400  | -0.10821300 |
| H | -0.36248600 | 2.12502600  | 0.41975800  |
| H | 1.34216400  | 1.90153300  | 0.35536400  |
| C | -1.10356600 | -0.12056700 | -0.02552600 |
| O | -1.94527900 | 0.62921100  | 0.47763900  |
| O | -1.35075200 | -1.45619400 | -0.18641800 |
| H | -2.26145500 | -1.59883400 | 0.11851400  |
| H | 0.23261900  | 1.43932100  | -1.22601900 |
| O | 2.07505200  | -0.60719700 | 0.74928000  |
| H | 1.51796600  | -1.11189800 | 1.35769000  |

### 3<sup>A</sup>

|   |             |             |             |
|---|-------------|-------------|-------------|
| C | 0.17182500  | 0.22360500  | -0.43616700 |
| H | 2.08178500  | -0.21061100 | -1.33743300 |
| C | 1.41170900  | -0.56496600 | -0.54440700 |
| H | 1.15844400  | -1.60703500 | -0.76227000 |
| N | 0.35438000  | 1.66385900  | -0.11500200 |
| H | -0.59793500 | 1.92241900  | 0.23820900  |
| H | 1.06169800  | 1.80433900  | 0.61632800  |
| C | -1.11014100 | -0.15252900 | -0.02612400 |
| O | -1.98057500 | 0.66808200  | 0.37333200  |

|   |             |             |             |
|---|-------------|-------------|-------------|
| O | -1.41096900 | -1.48765800 | -0.09116100 |
| H | -2.33811800 | -1.55593100 | 0.18443300  |
| H | 0.59696300  | 2.25060000  | -0.91737000 |
| O | 2.25586000  | -0.47325200 | 0.65037600  |
| H | 1.80161400  | -0.94482800 | 1.36292800  |

**TS3<sup>A1</sup>**

|   |             |             |             |
|---|-------------|-------------|-------------|
| C | -0.15961800 | 0.19679000  | 0.46685800  |
| H | -2.01341000 | -0.41922800 | 1.39045200  |
| C | -1.37535800 | -0.63421500 | 0.52042400  |
| H | -1.07475300 | -1.68406000 | 0.56786000  |
| N | -0.39581700 | 1.62780000  | 0.14059500  |
| H | 0.55068500  | 1.92133200  | -0.20018600 |
| H | -1.08987700 | 1.72831600  | -0.61038000 |
| C | 1.12183600  | -0.13867700 | 0.01999800  |
| O | 1.96518000  | 0.71156500  | -0.37436300 |
| O | 1.45928200  | -1.46591100 | 0.05645900  |
| H | 2.37926500  | -1.50446000 | -0.24714300 |
| H | -0.67974400 | 2.20930500  | 0.93262200  |
| O | -2.20955100 | -0.36943000 | -0.66173600 |
| H | -2.54188700 | -1.19899100 | -1.02395700 |

**4<sup>A1</sup>**

|   |             |             |             |
|---|-------------|-------------|-------------|
| C | -0.16313100 | 0.17858400  | 0.45557100  |
| H | -2.01001100 | -0.46753700 | 1.37035900  |
| C | -1.36665000 | -0.66543700 | 0.49687000  |
| H | -1.05662800 | -1.71484000 | 0.52683600  |
| N | -0.41060900 | 1.61400400  | 0.15992400  |
| H | 0.52772600  | 1.91655200  | -0.19627000 |
| H | -1.12724000 | 1.72000000  | -0.56808400 |
| C | 1.12777500  | -0.13519900 | 0.01743100  |
| O | 1.95984900  | 0.73357200  | -0.35971500 |
| O | 1.48547200  | -1.45518100 | 0.04400500  |
| H | 2.40262800  | -1.47872200 | -0.26954600 |
| H | -0.67412700 | 2.18237900  | 0.96865400  |
| O | -2.16450600 | -0.39007900 | -0.70246000 |
| H | -3.02256800 | -0.83004000 | -0.62528600 |



**TS4<sup>A1</sup>**

|   |             |             |             |
|---|-------------|-------------|-------------|
| C | 0.16254200  | 0.06806000  | -0.00004100 |
| H | 1.26488900  | -1.57623900 | -0.88751000 |
| C | 1.28638500  | -0.92333200 | -0.00000400 |
| H | 1.26484900  | -1.57622100 | 0.88751600  |
| N | 0.49286300  | 1.50312300  | -0.00000700 |
| H | -0.47314000 | 1.91557800  | 0.00001200  |
| H | 1.01691400  | 1.81430400  | 0.82346900  |
| C | -1.20933700 | -0.08964700 | -0.00000500 |
| O | -2.02913700 | 0.87780500  | 0.00002100  |
| O | -1.67520300 | -1.38325100 | -0.00000100 |
| H | -2.64162300 | -1.30533000 | 0.00001700  |
| H | 1.01689800  | 1.81434800  | -0.82347700 |
| O | 2.50476000  | -0.14395800 | 0.00001600  |
| H | 3.26027400  | -0.74355700 | 0.00003600  |

**5<sup>A1</sup>**

|   |             |             |             |
|---|-------------|-------------|-------------|
| C | 0.16313100  | 0.17858300  | 0.45557000  |
| H | 1.05662700  | -1.71484100 | 0.52683400  |
| C | 1.36665000  | -0.66543700 | 0.49687000  |
| H | 2.01001000  | -0.46753900 | 1.37036000  |
| N | 0.41060900  | 1.61400400  | 0.15992400  |
| H | -0.52772600 | 1.91655200  | -0.19626900 |
| H | 0.67412700  | 2.18237800  | 0.96865500  |
| C | -1.12777500 | -0.13519900 | 0.01743000  |
| O | -1.95984900 | 0.73357200  | -0.35971500 |
| O | -1.48547300 | -1.45518100 | 0.04400500  |
| H | -2.40262900 | -1.47872200 | -0.26954600 |
| H | 1.12724000  | 1.72000100  | -0.56808300 |
| O | 2.16450700  | -0.39007900 | -0.70245900 |
| H | 3.02257000  | -0.83003800 | -0.62528300 |

**TS5<sup>A1</sup>**

|   |             |             |             |
|---|-------------|-------------|-------------|
| C | 0.16593100  | 0.26035600  | 0.53600000  |
| H | 1.06654900  | -1.62754900 | 0.74012100  |
| C | 1.37545900  | -0.60174000 | 0.51267000  |
| H | 2.10978700  | -0.28554600 | 1.26823100  |
| N | 0.47498600  | 1.75134300  | 0.16140400  |
| H | -0.33097400 | 2.11276800  | -0.35108600 |

|   |             |             |             |
|---|-------------|-------------|-------------|
| H | 0.26413700  | 1.38098900  | 1.26681900  |
| C | -1.11690100 | -0.11712600 | 0.00833100  |
| O | -1.92889000 | 0.67265500  | -0.48216000 |
| O | -1.41184500 | -1.44174800 | 0.14712400  |
| H | -2.31287900 | -1.55255100 | -0.19664200 |
| H | 1.36499200  | 1.84023200  | -0.32396600 |
| O | 1.98807500  | -0.52016100 | -0.79807200 |
| H | 2.78783100  | -1.06266000 | -0.81045300 |

### R\_6<sup>A1</sup>

|   |             |             |             |
|---|-------------|-------------|-------------|
| C | 0.25322500  | 0.41261500  | 0.66567400  |
| H | 0.99784400  | -1.61077800 | 0.86893600  |
| C | 1.33866700  | -0.64821900 | 0.47053300  |
| H | 2.23354600  | -0.31942200 | 1.01332700  |
| N | 0.74303100  | 1.71073800  | 0.23976200  |
| H | -0.00113700 | 2.40173700  | 0.27528000  |
| H | 0.03719500  | 0.44690000  | 1.74308800  |
| C | -1.06302400 | -0.00711500 | -0.00879300 |
| O | -1.70069000 | 0.67229200  | -0.78252200 |
| O | -1.48212900 | -1.22979900 | 0.40621500  |
| H | -2.32360900 | -1.41364600 | -0.04516900 |
| H | 1.04285200  | 1.65246900  | -0.73075200 |
| O | 1.59487800  | -0.73628200 | -0.93347500 |
| H | 2.34240700  | -1.32579100 | -1.08926800 |

### R\_TS6<sup>A1</sup>

|   |             |             |             |
|---|-------------|-------------|-------------|
| C | -0.24421300 | 0.37720800  | -0.67782900 |
| H | -0.93262300 | -1.67878800 | -0.79224300 |
| C | -1.30955300 | -0.70703300 | -0.45753800 |
| H | -2.18817200 | -0.43558800 | -1.05141800 |
| N | -0.77038000 | 1.67346700  | -0.29016700 |
| H | -0.08500000 | 2.40395200  | -0.46095500 |
| H | -0.02360600 | 0.38649600  | -1.75427200 |
| C | 1.07317600  | 0.01103700  | 0.02190500  |
| O | 1.65197400  | 0.70041900  | 0.83253800  |
| O | 1.55830500  | -1.18342900 | -0.40199100 |
| H | 2.38835600  | -1.34523600 | 0.07812900  |
| H | -0.94485200 | 1.67252100  | 0.71240800  |
| O | -1.63046800 | -0.78589400 | 0.93466000  |
| H | -2.57638600 | -0.65366200 | 1.05863200  |

**R\_1<sup>A1</sup>**

|   |             |             |             |
|---|-------------|-------------|-------------|
| C | -0.26295600 | 0.32611700  | -0.68393400 |
| H | -0.92764600 | -1.75838300 | -0.66837200 |
| C | -1.31584200 | -0.77103800 | -0.40963300 |
| H | -2.19291600 | -0.56351500 | -1.04294800 |
| N | -0.77130900 | 1.60073900  | -0.17666300 |
| H | -1.22400100 | 2.14617800  | -0.90145100 |
| H | -0.05508500 | 0.33723100  | -1.76639900 |
| C | 1.06847600  | 0.01725400  | -0.00969200 |
| O | 1.67330800  | 0.77903400  | 0.71550200  |
| O | 1.53426000  | -1.20584200 | -0.34146500 |
| H | 2.37970100  | -1.33036100 | 0.12220500  |
| H | -0.02458700 | 2.14957500  | 0.24120600  |
| O | -1.66766100 | -0.79278800 | 0.95914100  |
| H | -1.81363000 | 0.13687400  | 1.20653500  |

**TS3<sup>A2</sup>**

|   |             |             |             |
|---|-------------|-------------|-------------|
| C | 0.19046900  | 0.15897500  | 0.17970700  |
| H | 1.40074800  | -0.50554600 | -1.47986800 |
| C | 1.27341000  | -0.69027400 | -0.40212300 |
| H | 1.00990900  | -1.74529000 | -0.26852700 |
| N | 0.43260200  | 1.69349800  | -0.00875100 |
| H | -0.39384400 | 2.16369100  | -0.38006700 |
| H | 0.43080000  | 1.14347000  | 1.05287400  |
| C | -1.21260900 | -0.11929000 | 0.05159700  |
| O | -2.09129700 | 0.74121400  | -0.04972100 |
| O | -1.52013400 | -1.45004100 | 0.08316300  |
| H | -2.48869200 | -1.50165800 | 0.03799100  |
| H | 1.32854400  | 1.89938400  | -0.44068700 |
| O | 2.56551400  | -0.38998900 | 0.15060200  |
| H | 2.54403100  | -0.61448100 | 1.09209600  |

**R\_4<sup>A2</sup>**

|   |             |             |             |
|---|-------------|-------------|-------------|
| C | -0.22180400 | 0.17778100  | -0.43897700 |
| H | -1.02891200 | -0.30365300 | 1.52580400  |
| C | -1.14036200 | -0.65633600 | 0.49578000  |
| H | -0.86906000 | -1.71943000 | 0.45379000  |
| N | -0.52839700 | 1.59847100  | -0.45939900 |

|   |             |             |             |
|---|-------------|-------------|-------------|
| H | -0.07894100 | 2.06840700  | 0.32284400  |
| H | -0.32429100 | -0.23250400 | -1.45334000 |
| C | 1.22000500  | -0.02719000 | -0.01024800 |
| O | 1.85679600  | 0.73725500  | 0.68259200  |
| O | 1.71679000  | -1.20948200 | -0.44794600 |
| H | 2.62086200  | -1.29130600 | -0.09829800 |
| H | -1.53356900 | 1.73424000  | -0.39430400 |
| O | -2.51240100 | -0.45913500 | 0.16690600  |
| H | -2.72382500 | -0.95968400 | -0.63244200 |

### R\_TS4<sup>A2</sup>

|   |             |             |             |
|---|-------------|-------------|-------------|
| C | -0.22009300 | 0.23679100  | -0.37854700 |
| H | -1.08454400 | -0.46733300 | 1.48109700  |
| C | -1.18421300 | -0.67837500 | 0.41294000  |
| H | -0.95058000 | -1.73324500 | 0.22735200  |
| N | -0.49757200 | 1.61604100  | -0.14192500 |
| H | 0.25668700  | 2.26106400  | 0.01578100  |
| H | -0.31852400 | -0.05252900 | -1.44610900 |
| C | 1.23041800  | -0.06145100 | -0.03230900 |
| O | 2.04262200  | 0.74938600  | 0.35718500  |
| O | 1.54035300  | -1.36632900 | -0.23587100 |
| H | 2.48066700  | -1.47558700 | -0.01388800 |
| H | -1.44930500 | 1.93574500  | -0.15117000 |
| O | -2.54057700 | -0.38228400 | 0.08432600  |
| H | -2.74724900 | -0.76837900 | -0.77722200 |

### R\_5<sup>A2</sup>

|   |             |             |             |
|---|-------------|-------------|-------------|
| C | 0.21457700  | 0.27308600  | 0.32135700  |
| H | 1.15435800  | -0.54312000 | -1.44189200 |
| C | 1.21156300  | -0.68193500 | -0.35914200 |
| H | 0.97651900  | -1.72315100 | -0.11666700 |
| N | 0.47140000  | 1.63291100  | -0.11559300 |
| H | -0.22794200 | 2.28128600  | 0.23100900  |
| H | 0.32151200  | 0.12296500  | 1.41667500  |
| C | -1.24116000 | -0.07668000 | 0.04331100  |
| O | -2.12429300 | 0.72885600  | -0.15165400 |
| O | -1.47254300 | -1.41272300 | 0.10223200  |
| H | -2.42688500 | -1.54258600 | -0.03319400 |
| H | 1.39884700  | 1.92874700  | 0.16942200  |
| O | 2.55232000  | -0.35253300 | 0.00980200  |

|   |            |             |            |
|---|------------|-------------|------------|
| H | 2.75004800 | -0.75015400 | 0.86758900 |
|---|------------|-------------|------------|

### **R\_TS5<sup>A2</sup>**

|   |             |             |             |
|---|-------------|-------------|-------------|
| C | 0.21271800  | 0.27544200  | 0.32521600  |
| H | 1.11924100  | -0.61386000 | -1.42059700 |
| C | 1.20860400  | -0.69068700 | -0.33094000 |
| H | 0.99768200  | -1.71862900 | -0.02384700 |
| N | 0.47041100  | 1.62863000  | -0.13779200 |
| H | -0.25501700 | 2.26998700  | 0.16698400  |
| H | 0.32166900  | 0.14968100  | 1.42131600  |
| C | -1.24102300 | -0.07891300 | 0.04622700  |
| O | -2.12937500 | 0.72538800  | -0.13090000 |
| O | -1.46664100 | -1.41683400 | 0.08148500  |
| H | -2.42120200 | -1.54780200 | -0.05132000 |
| H | 1.37580000  | 1.94593900  | 0.19252000  |
| O | 2.53394600  | -0.29453500 | 0.04526200  |
| H | 2.98371800  | -1.03292700 | 0.46969200  |

### **R\_6<sup>A2</sup>**

|   |             |             |             |
|---|-------------|-------------|-------------|
| C | -0.21588400 | 0.27414500  | -0.31908500 |
| H | -1.14896500 | -0.62563400 | 1.40146200  |
| C | -1.20692700 | -0.70866200 | 0.30843500  |
| H | -0.97222800 | -1.73423100 | 0.00335800  |
| N | -0.47920600 | 1.62037600  | 0.16520600  |
| H | 0.25524300  | 2.26199200  | -0.11727200 |
| H | -0.32416400 | 0.16669900  | -1.41668500 |
| C | 1.23890000  | -0.07691100 | -0.04420300 |
| O | 2.12179400  | 0.73519500  | 0.12761100  |
| O | 1.47461000  | -1.41183300 | -0.07533000 |
| H | 2.43115100  | -1.53391200 | 0.05189700  |
| H | -1.37524800 | 1.94569100  | -0.18176900 |
| O | -2.50013900 | -0.32022500 | -0.16627800 |
| H | -3.17800100 | -0.77977100 | 0.34366200  |

### **R\_TS6<sup>A2</sup>**

|   |            |             |             |
|---|------------|-------------|-------------|
| C | 1.19724200 | -0.72726000 | -0.30523000 |
| H | 0.96397500 | -1.75281600 | -0.00286500 |
| N | 0.50677400 | 1.61301500  | -0.10771300 |

|   |             |             |             |
|---|-------------|-------------|-------------|
| H | -0.26315000 | 2.24150500  | 0.10100400  |
| H | 0.31086900  | 0.12585900  | 1.43505700  |
| C | -1.23964200 | -0.06595800 | 0.03835400  |
| O | -2.09958700 | 0.75623300  | -0.19461400 |
| O | -1.50251600 | -1.39376600 | 0.11001100  |
| H | -2.45621100 | -1.50420700 | -0.04575000 |
| H | 1.35482300  | 1.95104600  | 0.33383600  |
| O | 2.51237600  | -0.38556600 | 0.14675500  |
| H | 3.10596200  | -0.32216000 | -0.60924900 |

**R\_1<sup>A2</sup>**

|   |             |             |             |
|---|-------------|-------------|-------------|
| C | 0.23312700  | 0.16491600  | 0.41773200  |
| H | 0.98469800  | -0.52616100 | -1.50324700 |
| C | 1.14463100  | -0.75383800 | -0.43626200 |
| H | 0.89745000  | -1.80417900 | -0.26567000 |
| N | 0.70907700  | 1.53767100  | 0.28025800  |
| H | 0.28999800  | 1.97385800  | -0.53898200 |
| H | 0.34465200  | -0.14778500 | 1.46126800  |
| C | -1.22572100 | -0.01396200 | 0.01269000  |
| O | -1.87792700 | 0.79100100  | -0.61929200 |
| O | -1.72023200 | -1.21000700 | 0.40974700  |
| H | -2.63659800 | -1.27077300 | 0.08850200  |
| H | 0.45106300  | 2.10343900  | 1.08274600  |
| O | 2.49540800  | -0.56504900 | -0.07223700 |
| H | 2.61498800  | 0.39765000  | 0.00286900  |

**S\_1<sup>B</sup>**

|   |             |             |             |
|---|-------------|-------------|-------------|
| C | -0.17461300 | 0.45075300  | 0.63748100  |
| H | -2.30295400 | 0.24676100  | 0.94157200  |
| C | -1.48481300 | -0.33693100 | 0.50833300  |
| H | -1.40188500 | -1.28523200 | 1.04922800  |
| N | -0.17434300 | 1.75378200  | -0.04386500 |
| H | -0.53284700 | 2.49601500  | 0.54809600  |
| H | -0.75421100 | 1.70557400  | -0.88067600 |
| C | 1.01339800  | -0.38609400 | 0.10917500  |
| O | 1.96606900  | 0.33917600  | -0.48822700 |
| O | 1.08069600  | -1.58998100 | 0.23900500  |
| H | 1.61009200  | 1.26044800  | -0.51743400 |
| H | 0.03003200  | 0.61621000  | 1.70380000  |
| O | -1.82533500 | -0.54625800 | -0.86083200 |
| H | -1.32310500 | -1.30611500 | -1.18703300 |

### S\_TS1<sup>B</sup>

|   |             |             |             |
|---|-------------|-------------|-------------|
| C | 0.14179000  | 0.74873600  | -0.37493000 |
| H | 2.07760600  | 0.46275900  | -1.29276900 |
| C | 1.26616400  | -0.16770700 | -0.91627800 |
| H | 0.88981800  | -0.77531400 | -1.75238300 |
| N | 0.51027000  | 1.44323400  | 0.86515800  |
| H | 0.80794400  | 2.39502200  | 0.68127700  |
| H | 1.26874200  | 0.94860700  | 1.32941100  |
| C | -1.12500300 | -0.05736900 | -0.10775600 |
| O | -0.95961500 | -0.99028300 | 0.91858900  |
| O | -2.14897700 | 0.01788000  | -0.73190000 |
| H | -1.24004600 | -0.61517400 | 1.76626400  |
| H | -0.11769600 | 1.47495300  | -1.15057600 |
| O | 1.84548000  | -0.97801500 | 0.09751800  |
| H | 1.14892700  | -1.53210600 | 0.48280000  |

### S\_2<sup>B</sup>

|   |             |             |             |
|---|-------------|-------------|-------------|
| C | 0.16024700  | 0.75758600  | -0.33653900 |
| H | 2.09959900  | 0.49319800  | -1.24864600 |
| C | 1.28673800  | -0.14811500 | -0.89389300 |
| H | 0.91669000  | -0.73005100 | -1.75197100 |
| N | 0.51005700  | 1.47478100  | 0.89065400  |
| H | 1.07937100  | 2.28808100  | 0.67600700  |
| H | 1.05113500  | 0.86949700  | 1.50399000  |
| C | -1.11821400 | -0.03890100 | -0.09205100 |

|   |             |             |             |
|---|-------------|-------------|-------------|
| O | -0.93044800 | -1.03209000 | 0.82663900  |
| O | -2.18212300 | 0.13581600  | -0.63998500 |
| H | -1.78692600 | -1.47609500 | 0.95277000  |
| H | -0.10726200 | 1.48689200  | -1.10623500 |
| O | 1.86542800  | -0.99007000 | 0.09387200  |
| H | 1.18151400  | -1.58766300 | 0.43019100  |

### TS2<sup>B</sup>

|   |             |             |             |
|---|-------------|-------------|-------------|
| C | 0.16856000  | 0.27488600  | -0.52937300 |
| H | 2.20113700  | 0.03298300  | -1.18950300 |
| C | 1.46846700  | -0.45399700 | -0.53824800 |
| H | 1.29143300  | -1.46378100 | -0.92158300 |
| N | 0.34201800  | 1.77465200  | -0.07484300 |
| H | 1.22984100  | 1.92062800  | 0.40132600  |
| H | -0.47099800 | 2.10148000  | 0.43909700  |
| C | -1.03974100 | -0.36158800 | -0.08677900 |
| O | -1.98529900 | 0.53677900  | 0.37846900  |
| O | -1.28806600 | -1.56167600 | -0.13338700 |
| H | -2.77128400 | 0.01097400  | 0.59707800  |
| H | 0.16487400  | 1.45031400  | -1.19600900 |
| O | 2.11826800  | -0.49255200 | 0.75421000  |
| H | 1.61793400  | -1.09137000 | 1.32556400  |

### 3<sup>B</sup>

|   |             |             |             |
|---|-------------|-------------|-------------|
| C | -0.16472600 | 0.18169000  | 0.47626600  |
| H | -2.11719200 | -0.19351900 | 1.32515900  |
| C | -1.44169100 | -0.55328700 | 0.53890600  |
| H | -1.23432400 | -1.61076800 | 0.72348700  |
| N | -0.35637800 | 1.62032600  | 0.12046300  |
| H | -1.08565200 | 1.70686300  | -0.60245000 |
| H | 0.53747000  | 1.96881600  | -0.24803100 |
| C | 1.06289200  | -0.36375700 | 0.07373100  |
| O | 1.98976500  | 0.63928800  | -0.31757700 |
| O | 1.42112800  | -1.54335900 | 0.04935600  |
| H | 2.80243100  | 0.16010100  | -0.53856100 |
| H | -0.62983200 | 2.20515800  | 0.91611600  |
| O | -2.24650900 | -0.37852100 | -0.67879700 |
| H | -1.83217800 | -0.90607500 | -1.37623600 |



**TS3<sup>B1</sup>**

|   |             |             |             |
|---|-------------|-------------|-------------|
| C | -0.15414900 | 0.15067900  | 0.48831600  |
| H | -2.04532600 | -0.42368500 | 1.38005600  |
| C | -1.40774700 | -0.62706200 | 0.50648400  |
| H | -1.14303300 | -1.68743800 | 0.50357000  |
| N | -0.38535900 | 1.58696800  | 0.14981000  |
| H | 0.51448000  | 1.97172600  | -0.16329900 |
| H | -1.07281500 | 1.66228000  | -0.61383200 |
| C | 1.08042800  | -0.35662500 | 0.05728100  |
| O | 1.98349300  | 0.67599700  | -0.31029000 |
| O | 1.46550500  | -1.52659200 | 0.00450600  |
| H | 2.80766900  | 0.22101700  | -0.53899200 |
| H | -0.72452300 | 2.14518600  | 0.93895200  |
| O | -2.21378700 | -0.26757700 | -0.67256100 |
| H | -2.63182000 | -1.05444700 | -1.04086400 |

**4<sup>B1</sup>**

|   |             |             |             |
|---|-------------|-------------|-------------|
| C | -0.15734600 | 0.12659000  | 0.46067500  |
| H | -2.03002500 | -0.48756100 | 1.36442800  |
| C | -1.39902300 | -0.66442700 | 0.47722200  |
| H | -1.12742500 | -1.72374900 | 0.44163800  |
| N | -0.40143000 | 1.57022100  | 0.16995400  |
| H | 0.47445100  | 1.95606800  | -0.20450900 |
| H | -1.14904100 | 1.65215600  | -0.53363000 |
| C | 1.09416700  | -0.35378700 | 0.04920000  |
| O | 1.98215600  | 0.70325000  | -0.28884700 |
| O | 1.50407300  | -1.51370100 | -0.01191300 |
| H | 2.81154800  | 0.26572200  | -0.53234500 |
| H | -0.67271200 | 2.12096400  | 0.99078100  |
| O | -2.19322900 | -0.28135900 | -0.69837500 |
| H | -3.06757300 | -0.69093100 | -0.64555000 |

**TS4<sup>B1</sup>**

|   |             |             |             |
|---|-------------|-------------|-------------|
| C | 0.15737500  | 0.03721300  | -0.02253400 |
| H | 1.34589800  | -1.55414400 | -0.89143400 |
| C | 1.32713600  | -0.90111800 | -0.00490800 |
| H | 1.32001000  | -1.55256800 | 0.88332500  |
| N | 0.46975800  | 1.48178800  | -0.00315500 |
| H | -0.44095800 | 1.96016600  | -0.00734700 |

|   |             |             |             |
|---|-------------|-------------|-------------|
| H | 1.00115000  | 1.77430600  | 0.82529800  |
| C | -1.17871300 | -0.31747000 | -0.00299900 |
| O | -2.04170900 | 0.82129600  | 0.00746900  |
| O | -1.68278600 | -1.44895900 | 0.00336900  |
| H | -2.93734100 | 0.45266900  | 0.01317600  |
| H | 1.01834600  | 1.78945800  | -0.81389200 |
| O | 2.50919100  | -0.06337900 | 0.01115300  |
| H | 3.29223300  | -0.62580600 | 0.01968300  |

**5<sup>B1</sup>**

|   |             |             |             |
|---|-------------|-------------|-------------|
| C | 0.15734600  | 0.12659000  | 0.46067600  |
| H | 1.12742500  | -1.72375000 | 0.44163800  |
| C | 1.39902300  | -0.66442800 | 0.47722200  |
| H | 2.03002500  | -0.48756200 | 1.36442800  |
| N | 0.40143000  | 1.57022100  | 0.16995400  |
| H | -0.47445000 | 1.95606800  | -0.20451000 |
| H | 0.67271100  | 2.12096400  | 0.99078100  |
| C | -1.09416700 | -0.35378700 | 0.04920000  |
| O | -1.98215600 | 0.70325100  | -0.28884700 |
| O | -1.50407300 | -1.51370000 | -0.01191300 |
| H | -2.81154800 | 0.26572300  | -0.53234400 |
| H | 1.14904300  | 1.65215600  | -0.53362800 |
| O | 2.19322900  | -0.28135900 | -0.69837500 |
| H | 3.06757200  | -0.69093100 | -0.64555100 |

**TS<sup>5B1</sup>**

|   |             |             |             |
|---|-------------|-------------|-------------|
| C | 0.16060200  | 0.20556700  | 0.53509700  |
| H | 1.15759500  | -1.63038700 | 0.65508700  |
| C | 1.42193700  | -0.57925600 | 0.49946000  |
| H | 2.12287900  | -0.26950000 | 1.28830900  |
| N | 0.41305200  | 1.71711100  | 0.16635500  |
| H | -0.38680400 | 2.10388000  | -0.32620100 |
| H | 0.22081800  | 1.34274600  | 1.26553400  |
| C | -1.07606100 | -0.34841900 | 0.05659200  |
| O | -1.95989700 | 0.62094100  | -0.38949700 |
| O | -1.40175400 | -1.52841300 | 0.07729400  |
| H | -2.77300100 | 0.14980700  | -0.63144800 |
| H | 1.30100000  | 1.82857600  | -0.31946500 |
| O | 2.05638000  | -0.38132500 | -0.78974600 |
| H | 2.86945600  | -0.90187000 | -0.82760500 |

**R\_6<sup>B1</sup>**

|   |             |             |             |
|---|-------------|-------------|-------------|
| C | 0.24740800  | 0.37314900  | 0.69632700  |
| H | 1.14955300  | -1.58524400 | 0.80274000  |
| C | 1.41216600  | -0.58523800 | 0.43979100  |
| H | 2.29092100  | -0.20934000 | 0.97821700  |
| N | 0.60527500  | 1.71376700  | 0.26589200  |
| H | -0.17265900 | 2.35696500  | 0.37210100  |
| H | 0.08195500  | 0.38231100  | 1.78227800  |
| C | -1.03841200 | -0.24164300 | 0.11468500  |
| O | -1.69734500 | 0.58208700  | -0.73339100 |
| O | -1.45420700 | -1.34340000 | 0.40818600  |
| H | -2.49024700 | 0.10358400  | -1.03067200 |
| H | 0.86482100  | 1.70365200  | -0.71686000 |
| O | 1.64338700  | -0.59366600 | -0.97212900 |
| H | 2.37708500  | -1.18607000 | -1.17518200 |

**R\_TS6<sup>B1</sup>**

|   |             |             |             |
|---|-------------|-------------|-------------|
| C | -0.22928000 | 0.43455200  | -0.66029000 |
| H | -1.24547700 | -1.45196600 | -0.90361400 |
| C | -1.45303000 | -0.46629800 | -0.47851700 |
| H | -2.30127000 | -0.00888000 | -1.00026400 |
| N | -0.50671000 | 1.75949900  | -0.13041500 |
| H | 0.31307000  | 2.35599400  | -0.17784100 |
| H | -0.05202500 | 0.52198000  | -1.74262000 |
| C | 1.01431200  | -0.29216800 | -0.11848000 |
| O | 1.84651700  | 0.51726900  | 0.57875000  |
| O | 1.26821600  | -1.46204500 | -0.32177700 |
| H | 2.60866100  | -0.02402300 | 0.84746000  |
| H | -0.78096700 | 1.69043100  | 0.84638600  |
| O | -1.74477100 | -0.55396000 | 0.92207900  |
| H | -1.94672800 | -1.46665800 | 1.15469900  |

**R\_7<sup>B1</sup>**

|   |             |             |             |
|---|-------------|-------------|-------------|
| C | -0.13136100 | 0.65268500  | -0.47274000 |
| H | -1.33594200 | -0.80393400 | -1.53392000 |

|   |             |             |             |
|---|-------------|-------------|-------------|
| C | -1.45912500 | -0.07288500 | -0.72305700 |
| H | -2.20012500 | 0.66877900  | -1.03088000 |
| N | -0.32225400 | 1.68985600  | 0.54208600  |
| H | 0.54916700  | 2.14132000  | 0.80129700  |
| H | 0.18686200  | 1.13714000  | -1.40453300 |
| C | 0.96202000  | -0.34466900 | -0.07832200 |
| O | 2.19853500  | 0.20035200  | -0.16089100 |
| O | 0.78521400  | -1.48555100 | 0.31107600  |
| H | 2.83552100  | -0.46441600 | 0.15432700  |
| H | -0.75991400 | 1.29455200  | 1.37063400  |
| O | -1.96928900 | -0.68966600 | 0.45200200  |
| H | -1.36467400 | -1.41430300 | 0.67569600  |

### R\_TS7<sup>B1</sup>

|   |             |             |             |
|---|-------------|-------------|-------------|
| C | 0.13157900  | 0.66877800  | 0.43537100  |
| H | 1.20228700  | -0.83176300 | 1.58284900  |
| C | 1.41215200  | -0.10669600 | 0.78301200  |
| H | 2.15981400  | 0.60415500  | 1.14489700  |
| N | 0.35739000  | 1.58958100  | -0.64760500 |
| H | -0.08418400 | 2.49013000  | -0.66976100 |
| H | -0.20032400 | 1.21516700  | 1.32655700  |
| C | -0.98661200 | -0.30984200 | 0.04426900  |
| O | -2.21866400 | 0.20128300  | 0.25719600  |
| O | -0.81799500 | -1.41214600 | -0.44857200 |
| H | -2.86587500 | -0.44038400 | -0.08436700 |
| H | 1.05885500  | 1.36395600  | -1.33289000 |
| O | 1.98060100  | -0.74441400 | -0.35234900 |
| H | 1.33344700  | -1.39954800 | -0.66016200 |

### R\_8<sup>B1</sup>

|   |             |             |             |
|---|-------------|-------------|-------------|
| C | 1.38353200  | -0.11399400 | 0.81570700  |
| H | 2.14689900  | 0.58562800  | 1.17093900  |
| N | 0.34126300  | 1.57773200  | -0.74964500 |
| H | 0.76022100  | 2.45374100  | -0.45361100 |
| H | -0.21245600 | 1.28698700  | 1.24388700  |
| C | -0.99759200 | -0.26738300 | 0.01646000  |
| O | -2.21561200 | 0.20167500  | 0.34396800  |
| O | -0.83821000 | -1.34172100 | -0.53804800 |
| H | -2.87417700 | -0.43572600 | 0.01620400  |
| H | 0.97254300  | 1.13413100  | -1.41358500 |

|   |            |             |             |
|---|------------|-------------|-------------|
| O | 1.96217000 | -0.81690100 | -0.27373000 |
| H | 1.29585300 | -1.44893400 | -0.59012300 |

**R\_TS8<sup>B1</sup>**

|   |             |             |             |
|---|-------------|-------------|-------------|
| C | 0.10888600  | 0.61552000  | 0.48150500  |
| H | 1.36967000  | -0.83297100 | 1.50044000  |
| C | 1.46530700  | -0.06431900 | 0.72060700  |
| H | 2.18327200  | 0.68568600  | 1.06734900  |
| N | 0.11904000  | 1.62826600  | -0.58573100 |
| H | 0.39145700  | 2.53881700  | -0.23009900 |
| H | -0.23224900 | 1.08961100  | 1.40933200  |
| C | -0.96851300 | -0.39316100 | 0.07817500  |
| O | -2.24841700 | 0.09597300  | 0.18593000  |
| O | -0.74114600 | -1.52268900 | -0.29060200 |
| H | -2.54752800 | 0.47087400  | -0.65476000 |
| H | 0.79073600  | 1.35186100  | -1.29938600 |
| O | 2.00633600  | -0.60962500 | -0.47657900 |
| H | 1.44309300  | -1.35925300 | -0.72447200 |

**R\_1<sup>B1</sup>**

|   |             |             |             |
|---|-------------|-------------|-------------|
| C | 0.17461300  | 0.45075200  | 0.63748100  |
| H | 1.40188400  | -1.28523400 | 1.04922600  |
| C | 1.48481200  | -0.33693300 | 0.50833300  |
| H | 2.30295400  | 0.24675900  | 0.94157300  |
| N | 0.17434400  | 1.75378200  | -0.04386400 |
| H | 0.53284700  | 2.49601500  | 0.54809700  |
| H | -0.03003200 | 0.61620900  | 1.70380100  |
| C | -1.01339800 | -0.38609300 | 0.10917500  |
| O | -1.96606800 | 0.33917700  | -0.48822700 |
| O | -1.08069700 | -1.58998000 | 0.23900500  |
| H | -1.61009000 | 1.26044800  | -0.51743400 |
| H | 0.75421300  | 1.70557300  | -0.88067500 |
| O | 1.82533400  | -0.54625800 | -0.86083300 |
| H | 1.32310400  | -1.30611500 | -1.18703400 |

**TS3<sup>B2</sup>**

|   |            |            |            |
|---|------------|------------|------------|
| C | 0.19010100 | 0.11706300 | 0.15854300 |
|---|------------|------------|------------|

|   |             |             |             |
|---|-------------|-------------|-------------|
| H | 1.45983200  | -0.52182800 | -1.46433400 |
| C | 1.33007500  | -0.67975800 | -0.38278300 |
| H | 1.12506600  | -1.74241600 | -0.21618500 |
| N | 0.37197800  | 1.66307000  | -0.05663000 |
| H | 0.32254300  | 1.15422700  | 1.01477600  |
| H | -0.40192500 | 2.13232400  | -0.52174100 |
| C | -1.16327300 | -0.34719600 | 0.05603100  |
| O | -2.08383400 | 0.68724500  | 0.01495300  |
| O | -1.53171400 | -1.51597100 | 0.04095900  |
| H | -2.95795400 | 0.26492800  | 0.00851100  |
| H | 1.30654700  | 1.88096000  | -0.38986800 |
| O | 2.59267700  | -0.27751900 | 0.17613200  |
| H | 2.58359200  | -0.50038100 | 1.11815800  |

#### **R\_4<sup>B2</sup>**

|   |             |             |             |
|---|-------------|-------------|-------------|
| C | -0.22806800 | 0.12784500  | -0.46433600 |
| H | -1.01820200 | -0.23894000 | 1.53423300  |
| C | -1.16447300 | -0.62480000 | 0.52032000  |
| H | -0.93851600 | -1.69923400 | 0.51636100  |
| N | -0.44408800 | 1.56859400  | -0.51982900 |
| H | -0.39973000 | -0.28754600 | -1.46468900 |
| H | -0.12344000 | 2.01647200  | 0.33496500  |
| C | 1.20972400  | -0.22652200 | -0.12526100 |
| O | 1.77966000  | 0.65561500  | 0.73150100  |
| O | 1.78202800  | -1.22256200 | -0.51425600 |
| H | 2.68047200  | 0.33922500  | 0.91603300  |
| H | -1.44058500 | 1.75071100  | -0.61250600 |
| O | -2.53197500 | -0.38030700 | 0.20379200  |
| H | -2.79218600 | -0.94195000 | -0.53822500 |

#### **R\_TS4<sup>B2</sup>**

|   |             |             |             |
|---|-------------|-------------|-------------|
| C | -0.21816600 | 0.11803800  | -0.45433000 |
| H | -1.04061200 | -0.24004600 | 1.53090500  |
| C | -1.19208300 | -0.60879000 | 0.51105600  |
| H | -1.00060200 | -1.68930400 | 0.49903400  |
| N | -0.36448700 | 1.57019600  | -0.49005600 |
| H | -0.40217100 | -0.26873300 | -1.46367500 |
| H | -0.22392300 | 1.95847200  | 0.44048100  |
| C | 1.21202200  | -0.28035800 | -0.11031900 |
| O | 1.85383000  | 0.59475400  | 0.74885400  |

|   |             |             |             |
|---|-------------|-------------|-------------|
| O | 1.71629200  | -1.31718300 | -0.45831800 |
| H | 2.37095400  | 1.25014800  | 0.25817700  |
| H | -1.31447700 | 1.80187600  | -0.76996700 |
| O | -2.54743300 | -0.31436000 | 0.18455500  |
| H | -2.82990500 | -0.88281300 | -0.54372900 |

### R\_1<sup>B2</sup>

|   |             |             |             |
|---|-------------|-------------|-------------|
| C | -0.19383700 | 0.11725200  | -0.46759400 |
| H | -0.98631500 | -0.40722800 | 1.48219300  |
| C | -1.16118100 | -0.67394000 | 0.43497000  |
| H | -0.97268700 | -1.74539200 | 0.31424300  |
| N | -0.39839400 | 1.55817700  | -0.27310300 |
| H | -0.34312400 | -0.20519500 | -1.50721000 |
| H | -1.36289100 | 1.74457500  | -0.00693400 |
| C | 1.24772700  | -0.26990000 | -0.08514700 |
| O | 1.89941500  | 0.67475400  | 0.60878300  |
| O | 1.72845600  | -1.34723200 | -0.35769700 |
| H | 1.27275800  | 1.43612100  | 0.66744900  |
| H | -0.20845400 | 2.08466700  | -1.12122600 |
| O | -2.52143600 | -0.33573000 | 0.17566000  |
| H | -2.81826000 | -0.78959900 | -0.62413900 |

### TS3<sup>B3</sup>

|   |             |             |             |
|---|-------------|-------------|-------------|
| C | -0.24008600 | 0.01399800  | -0.10108100 |
| H | -1.66884300 | -0.65571600 | 1.48715200  |
| C | -1.40003400 | -0.81434500 | 0.42808100  |
| H | -1.19036000 | -1.88090200 | 0.27861400  |
| N | -0.59608500 | 1.44730700  | 0.22916400  |
| H | -1.62740300 | 1.39294000  | 0.00702300  |
| H | -0.11453800 | 2.11615700  | -0.37204600 |
| C | 1.18261800  | -0.29560300 | -0.03317700 |
| O | 1.96409700  | 0.84270200  | -0.13212800 |
| O | 1.68068400  | -1.40387500 | 0.02036100  |
| H | 2.88674400  | 0.54116500  | -0.17944400 |
| H | -0.43983600 | 1.71275200  | 1.20568600  |
| O | -2.36757600 | -0.27532100 | -0.47682500 |
| H | -1.14579400 | -0.08989700 | -1.08533100 |

**R\_1<sup>B3</sup>**

|   |             |             |             |
|---|-------------|-------------|-------------|
| C | -0.23893200 | 0.10780800  | -0.44958200 |
| H | -0.98162200 | -0.45006000 | 1.51897100  |
| C | -1.17562100 | -0.71925400 | 0.46722400  |
| H | -0.98003000 | -1.78670100 | 0.34163100  |
| N | -0.63896100 | 1.51095800  | -0.36075000 |
| H | -2.59856700 | 0.47710700  | -0.01766100 |
| H | -0.31473700 | 2.04820200  | -1.15845600 |
| C | 1.21307000  | -0.22113200 | -0.11695600 |
| O | 1.80349400  | 0.71364000  | 0.67232100  |
| O | 1.78604100  | -1.22858400 | -0.47302100 |
| H | 2.70266900  | 0.39824900  | 0.86720400  |
| H | -0.26614500 | 1.94860000  | 0.47785200  |
| O | -2.52374500 | -0.48265900 | 0.12149800  |
| H | -0.40626500 | -0.23582400 | -1.47479300 |

**S\_2<sup>A1</sup>-2H<sub>2</sub>O**

|   |             |             |             |
|---|-------------|-------------|-------------|
| C | 0.21188100  | -0.05623900 | 0.03363500  |
| H | -0.71877100 | 1.50865200  | -1.09577100 |
| C | 0.28491300  | 1.09307800  | -0.98015900 |
| H | 0.62012300  | 0.71655100  | -1.95076300 |
| N | -0.39155400 | 0.41909800  | 1.28586100  |
| H | -0.19212400 | -0.24785700 | 2.02972000  |
| H | 0.06563300  | 1.29105300  | 1.55299500  |
| C | 1.56089900  | -0.72924300 | 0.27967200  |
| O | 1.95263600  | -1.12750400 | 1.35618600  |
| O | 2.28692600  | -0.87917800 | -0.85735200 |
| H | 3.08909900  | -1.37779300 | -0.62384100 |
| H | -3.70127300 | 0.45775000  | 1.44160000  |
| O | 1.11304100  | 2.16391800  | -0.51899300 |
| H | 2.03297800  | 1.96574100  | -0.73774300 |
| H | -2.18578300 | 0.56393800  | 1.01586600  |
| H | -0.44000400 | -0.82648700 | -0.40637700 |
| O | -3.11998600 | 0.52213500  | 0.67514000  |
| H | -2.92693100 | -0.82176400 | -0.53982200 |
| H | -3.07815400 | -1.57859300 | -1.89659300 |
| O | -2.50387600 | -1.48317800 | -1.12863000 |

**TS'2<sup>A1</sup>**



|   |             |             |             |
|---|-------------|-------------|-------------|
| C | 0.16358000  | 0.04240100  | -0.10385700 |
| H | -0.53100800 | 1.80404400  | -1.11241300 |
| C | 0.42209200  | 1.35293000  | -0.82289400 |
| H | 1.00179200  | 1.16360400  | -1.73060600 |
| N | -0.55597800 | 0.31548500  | 1.19121700  |
| H | -0.28170900 | -0.41968000 | 1.85413700  |
| H | -0.25220600 | 1.21917500  | 1.57065600  |
| C | 1.32668000  | -0.81032700 | 0.20709500  |
| O | 1.47458200  | -1.43283800 | 1.25353100  |
| O | 2.21512500  | -0.90289700 | -0.81360000 |
| H | 2.88073000  | -1.55999900 | -0.54975800 |
| H | -3.82342200 | -0.28420700 | 0.87399900  |
| O | 1.06337800  | 2.33224800  | 0.01850200  |
| H | 2.01439400  | 2.16048300  | 0.03491900  |
| H | -1.62147500 | 0.30106700  | 1.04591400  |
| H | -0.69914700 | -0.61773800 | -0.79400200 |
| O | -3.09221800 | 0.17048100  | 0.44070700  |
| H | -2.74577900 | -0.42799900 | -0.36154800 |
| H | -1.98718500 | -1.11073000 | -2.18690900 |
| O | -1.85302300 | -1.16029900 | -1.23226300 |

### 3<sup>Al</sup>-2H<sub>2</sub>O

|   |             |             |             |
|---|-------------|-------------|-------------|
| C | -0.27586200 | 0.11956800  | 0.04662600  |
| H | 0.35198000  | 1.82049600  | 1.21271500  |
| C | -0.56495800 | 1.32511800  | 0.87682600  |
| H | -1.13740800 | 1.03146700  | 1.76204300  |
| N | 0.43972200  | 0.47274500  | -1.22420600 |
| H | 0.15720400  | -0.25706000 | -1.89933100 |
| H | 0.12045500  | 1.38659500  | -1.56888900 |
| C | -1.25272900 | -0.87293400 | -0.25609200 |
| O | -1.29078100 | -1.53374900 | -1.31045200 |
| O | -2.16428300 | -1.11181900 | 0.73993400  |
| H | -2.70500800 | -1.85416400 | 0.42680700  |
| H | 3.91272300  | -0.08965300 | -1.00730300 |
| O | -1.26116100 | 2.37476800  | 0.13999400  |
| H | -2.17507200 | 2.08759300  | 0.00561000  |
| H | 1.47609200  | 0.47733600  | -1.12293700 |
| H | 1.08797200  | -0.84613100 | 1.04568400  |
| O | 3.16327000  | 0.29902500  | -0.54187300 |
| H | 2.97530900  | -0.27027500 | 0.24487000  |
| H | 1.98526900  | -1.09501600 | 2.32679900  |
| O | 1.98216900  | -1.16959000 | 1.36479900  |

**5<sup>Al</sup>-2H<sub>2</sub>O**

|   |             |             |             |
|---|-------------|-------------|-------------|
| C | 0.29390600  | 0.12725600  | 0.06136000  |
| H | 1.28323700  | 1.02134400  | 1.69914600  |
| C | 0.59388200  | 1.31697600  | 0.90240100  |
| H | -0.31187800 | 1.74011600  | 1.36110700  |
| N | -0.42918600 | 0.49580100  | -1.20020000 |
| H | -0.16449600 | -0.23758200 | -1.87885600 |
| C | 1.27149400  | -0.86058400 | -0.26251000 |
| O | 1.28886700  | -1.51215000 | -1.32331000 |
| O | 2.18117300  | -1.12650400 | 0.72328200  |
| H | 2.74222000  | -1.83763400 | 0.37589200  |
| H | -0.09073000 | 1.40287200  | -1.54321100 |
| O | 1.19479400  | 2.34463500  | 0.05594800  |
| H | 1.27339900  | 3.16909100  | 0.55447400  |
| H | -3.91890900 | 0.68485800  | -0.40235500 |
| H | -1.46261900 | 0.51791100  | -1.09230100 |
| H | -1.04871600 | -0.80607500 | 1.06843400  |
| O | -3.15869000 | 0.12919700  | -0.60724700 |
| H | -2.94307400 | -0.39639300 | 0.20344100  |
| H | -1.87205700 | -2.06027200 | 1.57096100  |
| O | -1.93586500 | -1.10651900 | 1.43597100  |

**TS'5<sup>Al</sup>**

|   |             |             |             |
|---|-------------|-------------|-------------|
| C | 0.18323400  | 0.04840700  | 0.10653300  |
| H | 1.10341000  | 1.16606100  | 1.67162700  |
| C | 0.43823400  | 1.35251700  | 0.82335200  |
| H | -0.50850700 | 1.75947000  | 1.19992100  |
| N | -0.53607000 | 0.31024500  | -1.19181200 |
| H | -0.25921600 | -0.43283600 | -1.84559000 |
| C | 1.34930000  | -0.80387400 | -0.20103100 |
| O | 1.48534400  | -1.43354700 | -1.24570000 |
| O | 2.22801200  | -0.91247200 | 0.82112700  |
| H | 2.90849100  | -1.54697100 | 0.54138400  |
| H | -0.22778000 | 1.20841300  | -1.57923100 |
| O | 1.03440700  | 2.27414600  | -0.11648400 |
| H | 1.11972600  | 3.14587600  | 0.29023800  |
| H | -3.82729400 | 0.48492100  | -0.37331300 |

|   |             |             |             |
|---|-------------|-------------|-------------|
| H | -1.59615100 | 0.29135800  | -1.05470200 |
| H | -0.68645500 | -0.58671000 | 0.82131300  |
| O | -3.08967200 | -0.10114300 | -0.57518200 |
| H | -2.73475900 | -0.52608900 | 0.32278100  |
| H | -1.87493500 | -1.85582000 | 1.68960900  |
| O | -1.84417300 | -0.93469500 | 1.40193000  |

### R\_6<sup>A1</sup>-2H<sub>2</sub>O

|   |             |             |             |
|---|-------------|-------------|-------------|
| C | 0.25683400  | 0.02245200  | -0.14046700 |
| H | 0.56644300  | -1.69477700 | 1.12534300  |
| C | 0.14061900  | -0.68974600 | 1.20578900  |
| H | -0.92082300 | -0.77257300 | 1.46346000  |
| N | -0.32028200 | 1.36945700  | -0.05252700 |
| H | -0.01288300 | 1.91951600  | -0.85300200 |
| C | 1.69316700  | 0.05273400  | -0.66774100 |
| O | 2.24792200  | 1.03699300  | -1.10979600 |
| O | 2.27521100  | -1.16824000 | -0.65113600 |
| H | 3.16432600  | -1.06931800 | -1.03219600 |
| H | 0.07139300  | 1.82943300  | 0.76883000  |
| O | 0.85100300  | 0.10201200  | 2.16677400  |
| H | 0.76107400  | -0.29682700 | 3.04055100  |
| H | -3.59011200 | 1.43236300  | 0.43344900  |
| H | -2.12292400 | 1.27078600  | -0.12883600 |
| H | -0.32984500 | -0.57572500 | -0.85094900 |
| O | -3.07972700 | 1.03959100  | -0.28390100 |
| H | -2.91643100 | -0.74812000 | -0.54333200 |
| H | -3.09788200 | -2.12141200 | -1.25891100 |
| O | -2.52867000 | -1.64437900 | -0.64471700 |

### S\_2<sup>B1</sup>-2H<sub>2</sub>O

|   |             |             |             |
|---|-------------|-------------|-------------|
| C | 0.22209300  | -0.05500600 | -0.05313400 |
| H | -0.73192700 | 1.72047300  | -0.78829000 |
| C | 0.27069200  | 1.28701400  | -0.78833200 |
| H | 0.58227500  | 1.12777200  | -1.82677700 |
| N | -0.32903300 | 0.14391700  | 1.30363000  |
| H | -0.21350500 | -0.69816800 | 1.86253700  |
| H | 0.18332600  | 0.89808100  | 1.76017400  |
| C | 1.60415300  | -0.70729000 | -0.03625800 |
| O | 1.62008100  | -1.84772900 | 0.69348500  |
| O | 2.59751900  | -0.28404400 | -0.59647700 |
| H | 2.52291400  | -2.20788800 | 0.65832500  |

|   |             |             |             |
|---|-------------|-------------|-------------|
| H | -3.64572200 | 0.45176900  | 1.50687700  |
| O | 1.12164000  | 2.22431100  | -0.13101300 |
| H | 2.03465400  | 1.96045500  | -0.31746900 |
| H | -2.12549100 | 0.47117000  | 1.08956900  |
| H | -0.45381300 | -0.72786400 | -0.59957400 |
| O | -3.05594900 | 0.54038900  | 0.74944400  |
| H | -2.95685200 | -0.67224000 | -0.61987900 |
| H | -3.14097900 | -1.24282700 | -2.05975400 |
| O | -2.57494900 | -1.28748300 | -1.28104000 |

### TS'2<sup>B1</sup>

|   |             |             |             |
|---|-------------|-------------|-------------|
| C | -0.16758600 | 0.03812400  | 0.13515300  |
| H | 0.67527400  | 1.86074000  | 0.90158300  |
| C | -0.31217200 | 1.42465600  | 0.72768000  |
| H | -0.83525500 | 1.35100000  | 1.68483900  |
| N | 0.51731600  | 0.15927400  | -1.20793100 |
| H | 0.31260200  | -0.66490200 | -1.77601600 |
| H | 0.16999200  | 0.99167100  | -1.69800000 |
| C | -1.43082300 | -0.71524900 | 0.04435100  |
| O | -1.46599200 | -1.58282800 | -1.02086700 |
| O | -2.35031400 | -0.65530900 | 0.84243400  |
| H | -2.28527100 | -2.09837800 | -0.94093200 |
| H | 3.82298800  | -0.22969700 | -0.86709900 |
| O | -0.98486000 | 2.33418200  | -0.16766600 |
| H | -1.93832700 | 2.20226700  | -0.07607500 |
| H | 1.58178000  | 0.22267200  | -1.06756400 |
| H | 0.71192200  | -0.62227100 | 0.83380900  |
| O | 3.05725000  | 0.18504100  | -0.45404600 |
| H | 2.73845300  | -0.41253500 | 0.35613200  |
| H | 1.99041400  | -1.12892800 | 2.18944900  |
| O | 1.85612700  | -1.16505300 | 1.23418000  |

### 3<sup>B1</sup>-2H<sub>2</sub>O

|   |             |             |             |
|---|-------------|-------------|-------------|
| C | -0.27553300 | 0.11367600  | 0.08264100  |
| H | 0.48122900  | 1.86264400  | 1.09713300  |
| C | -0.47011700 | 1.38956900  | 0.83327900  |
| H | -1.02369900 | 1.18147900  | 1.75316100  |
| N | 0.40295700  | 0.38363700  | -1.23616000 |
| H | 0.16674100  | -0.37118500 | -1.88608500 |
| H | 0.05764400  | 1.27183400  | -1.62466600 |
| C | -1.36511300 | -0.80431200 | -0.01587700 |

|   |             |             |             |
|---|-------------|-------------|-------------|
| O | -1.31422700 | -1.59056800 | -1.17317500 |
| O | -2.26139600 | -0.99492500 | 0.80460900  |
| H | -2.04331500 | -2.22490600 | -1.09310700 |
| H | 3.90138800  | -0.05805300 | -1.00791600 |
| O | -1.15250200 | 2.40907900  | 0.04155400  |
| H | -2.09056300 | 2.17496200  | 0.00895600  |
| H | 1.44055700  | 0.42756200  | -1.13905200 |
| H | 1.07833000  | -0.86097200 | 1.04244200  |
| O | 3.11922500  | 0.28403200  | -0.56043700 |
| H | 2.94819400  | -0.29102100 | 0.22754100  |
| H | 1.99246500  | -1.18059300 | 2.29879200  |
| O | 1.97576200  | -1.20896900 | 1.33440600  |

### **5<sup>BI</sup>-2H<sub>2</sub>O**

|   |             |             |             |
|---|-------------|-------------|-------------|
| C | 0.30773300  | 0.13096600  | 0.09241800  |
| H | 1.22972100  | 1.17682100  | 1.66934500  |
| C | 0.52674600  | 1.38897000  | 0.85821400  |
| H | -0.40424800 | 1.79051800  | 1.28419500  |
| N | -0.38842100 | 0.41797500  | -1.21257600 |
| H | -0.15526200 | -0.32709400 | -1.87490300 |
| C | 1.37805700  | -0.80929000 | -0.02410600 |
| O | 1.30012300  | -1.57316500 | -1.19744500 |
| O | 2.25950700  | -1.05307300 | 0.79460900  |
| H | 2.02572800  | -2.21367800 | -1.14002400 |
| H | -0.04813400 | 1.31280100  | -1.58805200 |
| O | 1.07410000  | 2.39099200  | -0.05464900 |
| H | 1.14037300  | 3.24156000  | 0.39912000  |
| H | -3.87545400 | 0.60200100  | -0.49461900 |
| H | -1.42432900 | 0.45068400  | -1.10863700 |
| H | -1.03346200 | -0.76537900 | 1.10670900  |
| O | -3.11256600 | 0.03764300  | -0.66323100 |
| H | -2.90890200 | -0.44847600 | 0.17601400  |
| H | -1.84261900 | -1.98314700 | 1.72093600  |
| O | -1.92862400 | -1.05568700 | 1.46806500  |

### **TS'5<sup>BI</sup>**

|   |             |            |            |
|---|-------------|------------|------------|
| C | 0.20427200  | 0.05842700 | 0.14366200 |
| H | 1.05873300  | 1.33757700 | 1.60670900 |
| C | 0.36978700  | 1.42591500 | 0.76174000 |
| H | -0.59708600 | 1.80008300 | 1.11994100 |

|   |             |             |             |
|---|-------------|-------------|-------------|
| N | -0.49596800 | 0.20248400  | -1.18991200 |
| H | -0.26684000 | -0.59497500 | -1.78631100 |
| C | 1.45214600  | -0.72257200 | 0.03852500  |
| O | 1.48567600  | -1.52628200 | -1.07986300 |
| O | 2.34019000  | -0.75933300 | 0.86816500  |
| H | 2.29161900  | -2.06418500 | -1.01515100 |
| H | -0.17556400 | 1.06112000  | -1.65130100 |
| O | 0.89605300  | 2.31226300  | -0.25326600 |
| H | 0.97798700  | 3.20591500  | 0.10278800  |
| H | -3.79672200 | 0.42694400  | -0.43131100 |
| H | -1.55790400 | 0.21682900  | -1.05368600 |
| H | -0.67768500 | -0.56688800 | 0.87322900  |
| O | -3.05968800 | -0.16945100 | -0.60340600 |
| H | -2.71875400 | -0.56098700 | 0.31333500  |
| H | -1.84656000 | -1.80877500 | 1.77728600  |
| O | -1.83431600 | -0.91228000 | 1.41965700  |

### **R\_6<sup>B1</sup>-2H<sub>2</sub>O**

|   |             |             |             |
|---|-------------|-------------|-------------|
| C | -0.26375900 | -0.12682700 | -0.03018500 |
| H | -0.58717400 | 0.92426100  | -1.87530200 |
| C | -0.12692500 | 1.11878900  | -0.90176200 |
| H | 0.93777100  | 1.33811600  | -1.03891900 |
| N | 0.29453600  | 0.13280000  | 1.30471200  |
| H | 0.07161700  | -0.63334200 | 1.93522200  |
| C | -1.71149000 | -0.62916700 | -0.05853100 |
| O | -2.17144900 | -1.00455000 | 1.16227300  |
| O | -2.37877900 | -0.73890500 | -1.06400900 |
| H | -3.07416600 | -1.34200800 | 1.03219700  |
| H | -0.14390900 | 0.96813500  | 1.68911700  |
| O | -0.79059200 | 2.18849400  | -0.21443400 |
| H | -0.81859300 | 2.96732200  | -0.78267400 |
| H | 3.52630300  | 0.86995600  | 1.20815200  |
| H | 2.11004700  | 0.17400000  | 1.23300600  |
| H | 0.33701400  | -0.90937800 | -0.51386300 |
| O | 3.07913500  | 0.02916200  | 1.05745600  |
| H | 2.92804100  | -0.73405100 | -0.58940300 |
| H | 3.11007200  | -1.79927600 | -1.71461200 |
| O | 2.53096800  | -1.09046400 | -1.41291600 |

### **S\_2<sup>A1</sup>-(H<sub>2</sub>O·OH·)**

|   |            |             |             |
|---|------------|-------------|-------------|
| C | 0.18922000 | -0.11966200 | -0.02451800 |
|---|------------|-------------|-------------|

|   |             |             |             |
|---|-------------|-------------|-------------|
| H | -0.88441300 | 1.71605700  | -0.29348300 |
| C | 0.15344200  | 1.38093600  | -0.34649100 |
| H | 0.51802300  | 1.55573900  | -1.36225900 |
| N | -0.41536400 | -0.36345300 | 1.29256700  |
| H | -0.12676900 | -1.27995500 | 1.63311000  |
| H | -0.03340600 | 0.31550800  | 1.95203100  |
| C | 1.58907700  | -0.72446700 | -0.11542700 |
| O | 2.03945600  | -1.54796000 | 0.65275200  |
| O | 2.28597500  | -0.27112400 | -1.18661000 |
| H | 3.13061800  | -0.75362100 | -1.20801500 |
| O | 0.88073300  | 2.14820800  | 0.61607400  |
| H | 1.81026400  | 2.18584500  | 0.35606400  |
| H | -2.16909000 | -0.32135400 | 1.22653500  |
| H | -0.41644800 | -0.61894000 | -0.79489300 |
| O | -3.17343100 | -0.34102400 | 1.05854600  |
| H | -3.00816400 | -0.33480900 | -0.82504600 |
| H | -3.24806600 | -0.47458600 | -2.35990200 |
| O | -2.56466300 | -0.32141800 | -1.69744800 |

### TS''2<sup>A1</sup>

|   |             |             |             |
|---|-------------|-------------|-------------|
| C | 0.13999500  | 0.05043500  | -0.11531200 |
| H | -0.53438600 | 1.82410300  | -1.12227200 |
| C | 0.41047400  | 1.36616400  | -0.81593900 |
| H | 1.00831300  | 1.18598300  | -1.71364700 |
| N | -0.58349700 | 0.31122200  | 1.18167400  |
| H | -0.31483000 | -0.43616700 | 1.83522100  |
| H | -0.28027800 | 1.20949800  | 1.57597000  |
| C | 1.28531000  | -0.82055500 | 0.19157900  |
| O | 1.41537400  | -1.45986200 | 1.23129900  |
| O | 2.18100000  | -0.91404000 | -0.82328300 |
| H | 2.83726100  | -1.58047500 | -0.55951300 |
| O | 1.03417600  | 2.33885600  | 0.04810800  |
| H | 1.98563100  | 2.17116000  | 0.07894100  |
| H | -1.63569700 | 0.30297400  | 1.04300500  |
| H | -0.77419000 | -0.61306700 | -0.81390800 |
| O | -3.25626900 | 0.12674100  | 0.49709500  |
| H | -2.88013300 | -0.47187700 | -0.28913600 |
| H | -2.04387400 | -1.26946900 | -2.11356500 |
| O | -1.91153300 | -1.10138100 | -1.17256700 |

### 3<sup>A1</sup>-(H<sub>2</sub>O·OH·)

|   |             |             |             |
|---|-------------|-------------|-------------|
| C | 0.53635200  | 1.33656400  | -0.87286200 |
| H | 1.11610700  | 1.05622500  | -1.75741500 |
| N | -0.46530500 | 0.46111400  | 1.21792600  |
| H | -0.19207100 | -0.28375300 | 1.88153600  |
| H | -0.13118600 | 1.36501900  | 1.57629800  |
| C | 1.22068700  | -0.87711500 | 0.23279600  |
| O | 1.26002800  | -1.54172400 | 1.28319400  |
| O | 2.12690900  | -1.10957500 | -0.76724300 |
| H | 2.67463600  | -1.84950500 | -0.46007700 |
| O | 1.22342100  | 2.37276700  | -0.11136000 |
| H | 2.14279700  | 2.09730800  | 0.00930100  |
| H | -1.49785200 | 0.48629300  | 1.12324200  |
| H | -1.13552000 | -0.81563400 | -1.00375400 |
| O | -3.32211200 | 0.29441900  | 0.58310500  |
| H | -3.07964300 | -0.29652200 | -0.19391900 |
| H | -2.07500900 | -1.35493800 | -2.18624000 |
| O | -2.05920300 | -1.13195400 | -1.24810000 |

**5<sup>Al</sup>-(H<sub>2</sub>O·OH·)**

|   |             |             |             |
|---|-------------|-------------|-------------|
| C | -0.23963300 | 0.11726900  | -0.06322700 |
| H | 0.37749600  | 1.83593400  | -1.21146700 |
| C | -0.53635100 | 1.33656400  | -0.87286200 |
| H | -1.11610600 | 1.05622600  | -1.75741500 |
| N | 0.46530600  | 0.46111300  | 1.21792600  |
| H | 0.19207100  | -0.28375400 | 1.88153600  |
| H | 0.13118600  | 1.36501800  | 1.57629800  |
| C | -1.22068800 | -0.87711500 | 0.23279600  |
| O | -1.26002800 | -1.54172400 | 1.28319400  |
| O | -2.12690900 | -1.10957400 | -0.76724300 |
| H | -2.67463600 | -1.84950400 | -0.46007700 |
| O | -1.22342100 | 2.37276800  | -0.11136000 |
| H | -2.14279700 | 2.09730900  | 0.00930100  |
| H | 1.49785200  | 0.48629300  | 1.12324200  |
| H | 1.13552000  | -0.81563500 | -1.00375400 |
| O | 3.32211200  | 0.29442000  | 0.58310500  |
| H | 3.07964300  | -0.29652200 | -0.19391900 |
| H | 2.07500800  | -1.35494100 | -2.18623900 |
| O | 2.05920300  | -1.13195500 | -1.24810000 |

**TS''5A1**



|   |             |             |             |
|---|-------------|-------------|-------------|
| C | 0.15803600  | 0.06324400  | 0.11486800  |
| H | 1.14512500  | 1.18481400  | 1.63466400  |
| C | 0.46772700  | 1.37334800  | 0.79633400  |
| H | -0.45577500 | 1.82242200  | 1.18300800  |
| N | -0.56056200 | 0.31844600  | -1.18637100 |
| H | -0.27138400 | -0.42753400 | -1.83450300 |
| C | 1.27700600  | -0.84657500 | -0.18111000 |
| O | 1.37363800  | -1.50469100 | -1.21421400 |
| O | 2.16046500  | -0.97473700 | 0.83483800  |
| H | 2.81040700  | -1.64267200 | 0.56045800  |
| H | -0.25991100 | 1.21935800  | -1.57565600 |
| O | 1.07325900  | 2.25441100  | -0.17661000 |
| H | 1.17369400  | 3.13835600  | 0.19958300  |
| H | -1.61108900 | 0.29364700  | -1.06042600 |
| H | -0.77521100 | -0.53310500 | 0.85905200  |
| O | -3.23884000 | -0.06635300 | -0.59494800 |
| H | -2.86302400 | -0.42052400 | 0.32782200  |
| H | -1.97843900 | -1.63951900 | 1.85321700  |
| O | -1.91940700 | -0.80418700 | 1.37303700  |

**R\_6<sup>Al</sup>-(H<sub>2</sub>O·OH·)**

|   |             |             |             |
|---|-------------|-------------|-------------|
| C | 0.21641200  | -0.07480700 | 0.12836600  |
| H | 0.52914600  | 2.04192500  | -0.13427700 |
| C | 0.09442400  | 1.20733400  | -0.69359000 |
| H | -0.96852600 | 1.40976900  | -0.86542000 |
| N | -0.37195800 | -1.20385000 | -0.60551000 |
| H | -0.03213100 | -2.07717900 | -0.20449100 |
| C | 1.65664300  | -0.36958400 | 0.55248600  |
| O | 2.20023300  | -1.44879400 | 0.44555700  |
| O | 2.25280300  | 0.69747700  | 1.12947000  |
| H | 3.14423500  | 0.41971800  | 1.40120700  |
| H | -0.01524300 | -1.18208100 | -1.56111300 |
| O | 0.79065400  | 0.98592600  | -1.92556800 |
| H | 0.66973300  | 1.74725600  | -2.50567200 |
| H | -2.11409500 | -1.19632700 | -0.54368900 |
| H | -0.35725100 | 0.09481300  | 1.04957500  |
| O | -3.12225900 | -1.12533000 | -0.40245300 |
| H | -3.00250200 | 0.30702200  | 0.81994400  |
| H | -3.28180300 | 1.34112900  | 1.95304600  |
| O | -2.59302300 | 1.00862600  | 1.36623000  |

**S\_2<sup>A1</sup>-[(OH·)·H<sub>2</sub>O]**

|   |             |             |             |
|---|-------------|-------------|-------------|
| C | 0.19038400  | -0.06260300 | 0.01992100  |
| H | -0.72807800 | 1.57453600  | -1.01663200 |
| C | 0.27258400  | 1.14532600  | -0.92409500 |
| H | 0.60877600  | 0.82620500  | -1.91463800 |
| N | -0.40580200 | 0.34311600  | 1.29934000  |
| H | -0.20355900 | -0.36283100 | 2.00564400  |
| H | 0.05338100  | 1.19944200  | 1.61018200  |
| C | 1.53444300  | -0.76257800 | 0.22253000  |
| O | 1.92085400  | -1.22693000 | 1.27375600  |
| O | 2.25550800  | -0.85011000 | -0.92237700 |
| H | 3.05460700  | -1.36872700 | -0.72410800 |
| H | -3.73669300 | 0.57501400  | 1.29865300  |
| O | 1.10592000  | 2.17777500  | -0.39322200 |
| H | 2.02359900  | 1.99985100  | -0.63725800 |
| H | -2.17660300 | 0.50118600  | 1.00188400  |
| H | -0.46806300 | -0.80304100 | -0.46030600 |
| O | -3.08583200 | 0.46922100  | 0.59565600  |
| H | -3.04346400 | -0.81383300 | -0.60944000 |
| O | -2.76242100 | -1.52626600 | -1.24875000 |

**TS''2<sup>A1</sup>**

|   |             |             |             |
|---|-------------|-------------|-------------|
| C | 0.13927800  | 0.04470200  | -0.10958900 |
| H | -0.55529200 | 1.82047700  | -1.10132000 |
| C | 0.39446300  | 1.37523800  | -0.79123000 |
| H | 1.00438700  | 1.21583900  | -1.68416400 |
| N | -0.58576900 | 0.27834000  | 1.19150000  |
| H | -0.28543200 | -0.46182400 | 1.83967900  |
| H | -0.30479300 | 1.18573800  | 1.58144900  |
| C | 1.29381400  | -0.81849600 | 0.18536700  |
| O | 1.41516900  | -1.48615300 | 1.20991400  |
| O | 2.20569600  | -0.86805300 | -0.81527800 |
| H | 2.86227700  | -1.54042200 | -0.56814500 |
| H | -3.93821500 | -0.36894800 | 0.69009300  |
| O | 0.99189600  | 2.34404100  | 0.09505900  |
| H | 1.94661100  | 2.19623600  | 0.12654700  |
| H | -1.63679500 | 0.23643900  | 1.05581500  |
| H | -0.72964800 | -0.58537600 | -0.87743800 |
| O | -3.12844100 | 0.04594900  | 0.37264300  |
| H | -2.77700900 | -0.47579200 | -0.44526500 |
| O | -1.79070100 | -1.13321100 | -1.44546700 |

**3<sup>'</sup>Al-2H<sub>2</sub>O**

|   |             |             |             |
|---|-------------|-------------|-------------|
| C | 0.64024800  | 0.25651800  | 0.33984100  |
| H | -0.92006400 | 1.34608200  | -0.64185600 |
| C | 0.08114800  | 1.52767300  | -0.22979900 |
| H | 0.72316400  | 1.89149100  | -1.03621000 |
| N | 0.07576100  | -0.21945600 | 1.50569000  |
| H | 0.63207000  | -0.91845200 | 1.98926500  |
| H | -0.33458200 | 0.49661500  | 2.09719800  |
| C | 1.63180700  | -0.58720600 | -0.27331600 |
| O | 2.01751400  | -1.65463700 | 0.21131400  |
| O | 2.12805600  | -0.10370500 | -1.44979400 |
| H | 2.78024000  | -0.75272100 | -1.75933500 |
| H | -2.01146000 | -2.66405000 | 0.23977500  |
| O | -0.09976700 | 2.51710500  | 0.79998700  |
| H | 0.76028500  | 2.90362900  | 1.01351600  |
| H | -1.50018600 | -1.36339700 | 0.91825100  |
| H | -3.70406500 | 0.51468300  | -1.41750900 |
| O | -2.29306400 | -1.79000200 | 0.53778000  |
| H | -2.77912000 | -0.54978700 | -0.76192300 |
| O | -2.78971700 | 0.21251200  | -1.37445700 |

**S\_2<sup>Al</sup>·(H<sub>2</sub>O·OH)**

|   |             |             |             |
|---|-------------|-------------|-------------|
| C | 0.17410300  | -0.25840900 | -0.08892400 |
| H | 0.38883000  | -2.34884100 | 0.24742100  |
| C | 0.97637900  | -1.45477800 | 0.45061700  |
| H | 1.10641900  | -1.35321700 | 1.53389100  |
| N | -0.49971200 | -0.53811800 | -1.35473600 |
| H | -1.47940900 | -0.25907700 | -1.28442700 |
| H | -0.08235900 | -0.00968200 | -2.11266400 |
| C | 1.00629900  | 0.99107700  | -0.13458100 |
| O | 0.99652300  | 1.85529600  | -0.98140100 |
| O | 1.87062500  | 1.09512700  | 0.93622100  |
| H | 2.28917000  | 1.96267300  | 0.84285000  |
| O | 2.25715700  | -1.67477700 | -0.17141000 |
| H | 2.82535100  | -0.95076100 | 0.11212300  |
| H | -3.70220200 | -1.00821500 | -0.56279800 |
| H | -0.62071000 | -0.05650300 | 0.68828000  |
| O | -3.54170200 | -0.06055200 | -0.56447100 |
| H | -3.04041400 | 0.11054100  | 0.34471400  |
| H | -2.52000600 | -0.02268300 | 2.35969100  |
| O | -2.15852500 | 0.28931200  | 1.52498500  |

**TS'''2<sup>Al</sup>**

|   |             |             |             |
|---|-------------|-------------|-------------|
| C | 0.10877700  | 0.04861900  | 0.13963600  |
| H | -0.65025300 | 1.94772000  | -0.43686600 |
| C | 0.27354000  | 1.38509000  | -0.56383600 |
| H | 0.44233900  | 1.22739700  | -1.63431400 |
| N | -0.56326800 | 0.16953900  | 1.43731800  |
| H | -0.93985700 | -0.73591500 | 1.69957100  |
| H | 0.09090800  | 0.43667800  | 2.16856700  |
| C | 1.33030900  | -0.77619800 | 0.17495300  |
| O | 1.66021200  | -1.59088800 | 1.01786700  |
| O | 2.14858300  | -0.59100300 | -0.93338400 |
| H | 2.84274100  | -1.25839200 | -0.84146300 |
| O | 1.32454600  | 2.23521800  | -0.03857600 |
| H | 2.15385600  | 1.78782500  | -0.23869900 |
| H | -2.82776100 | 0.59065300  | 0.84112800  |
| H | -0.69626700 | -0.57352700 | -0.56839000 |
| O | -3.54091700 | 0.26701400  | 0.27509100  |
| H | -3.03529700 | -0.32116400 | -0.35523800 |
| H | -1.79424300 | -1.06601800 | -2.15241400 |
| O | -1.83230600 | -1.21622700 | -1.20195200 |

**3'''<sup>Al</sup>·2H<sub>2</sub>O**

|   |             |             |             |
|---|-------------|-------------|-------------|
| C | 0.27399500  | 0.20810300  | 0.22133300  |
| H | -0.76716600 | 1.65652500  | -0.94897500 |
| C | 0.25203900  | 1.30451000  | -0.76831000 |
| H | 0.69672400  | 0.98235400  | -1.71454800 |
| N | -0.58955400 | 0.38221000  | 1.39064700  |
| H | -0.45983900 | -0.43446400 | 1.98386100  |
| H | -0.27889500 | 1.17986600  | 1.94684000  |
| C | 1.31344400  | -0.72214600 | 0.32416500  |
| O | 1.53850500  | -1.52820600 | 1.25065800  |
| O | 2.17422900  | -0.79096800 | -0.79850400 |
| H | 2.72904500  | -1.55202600 | -0.58737100 |
| O | 0.95512500  | 2.53679400  | -0.33800100 |
| H | 1.82091600  | 2.23635500  | -0.03913700 |
| H | -2.48368700 | 0.34976300  | 0.86990200  |
| H | -0.93965500 | -1.06749700 | -0.84893900 |
| O | -3.35576300 | 0.15518700  | 0.45939200  |
| H | -3.10556600 | -0.44872600 | -0.25483300 |

|   |             |             |             |
|---|-------------|-------------|-------------|
| H | -1.41162900 | -1.28382700 | -2.29292900 |
| O | -1.65087600 | -1.50238200 | -1.38748600 |

**5<sup>A1</sup>·2H<sub>2</sub>O**

|   |             |             |             |
|---|-------------|-------------|-------------|
| C | -0.27399600 | 0.20810300  | 0.22133300  |
| H | 0.76716500  | 1.65652500  | -0.94897500 |
| C | -0.25204000 | 1.30451000  | -0.76831000 |
| H | -0.69672500 | 0.98235500  | -1.71454800 |
| N | 0.58955300  | 0.38221000  | 1.39064700  |
| H | 0.45983800  | -0.43446400 | 1.98386100  |
| H | 0.27889500  | 1.17986600  | 1.94684100  |
| C | -1.31344400 | -0.72214700 | 0.32416500  |
| O | -1.53850400 | -1.52820700 | 1.25065700  |
| O | -2.17422900 | -0.79096900 | -0.79850400 |
| H | -2.72904400 | -1.55202800 | -0.58737100 |
| O | -0.95512600 | 2.53679500  | -0.33800100 |
| H | -1.82091600 | 2.23635600  | -0.03913600 |
| H | 2.48368700  | 0.34976300  | 0.86990300  |
| H | 0.93965500  | -1.06749800 | -0.84894100 |
| O | 3.35576300  | 0.15518600  | 0.45939300  |
| H | 3.10566600  | -0.44872700 | -0.25483200 |
| H | 1.41163400  | -1.28382000 | -2.29293000 |
| O | 1.65087700  | -1.50238100 | -1.38748700 |

**TS<sup>''''</sup>5<sup>A1</sup>**

|   |             |             |             |
|---|-------------|-------------|-------------|
| C | -0.10877700 | 0.04861900  | 0.13963600  |
| H | 0.65025200  | 1.94772000  | -0.43686800 |
| C | -0.27354200 | 1.38509000  | -0.56383700 |
| H | -0.44234100 | 1.22739600  | -1.63431500 |
| N | 0.56326800  | 0.16954000  | 1.43731700  |
| H | 0.93985900  | -0.73591300 | 1.69957000  |
| H | -0.09090800 | 0.43667900  | 2.16856700  |
| C | -1.33030800 | -0.77619900 | 0.17495300  |
| O | -1.66021100 | -1.59088900 | 1.01786800  |
| O | -2.14858300 | -0.59100400 | -0.93338300 |
| H | -2.84274100 | -1.25839300 | -0.84146300 |
| O | -1.32454800 | 2.23521700  | -0.03857600 |
| H | -2.15385700 | 1.78782400  | -0.23869900 |
| H | 2.82776000  | 0.59065300  | 0.84112900  |
| H | 0.69626600  | -0.57352600 | -0.56839000 |
| O | 3.54091600  | 0.26701500  | 0.27509300  |

|   |            |             |             |
|---|------------|-------------|-------------|
| H | 3.03529600 | -0.32116400 | -0.35523800 |
| H | 1.79424600 | -1.06601600 | -2.15241500 |
| O | 1.83230800 | -1.21622600 | -1.20195300 |

**R\_6<sup>Al</sup>·(H<sub>2</sub>O·OH)**

|   |             |             |             |
|---|-------------|-------------|-------------|
| C | -0.17410300 | 0.25840700  | 0.08892500  |
| H | -0.38882200 | 2.34884000  | -0.24741500 |
| C | -0.97637300 | 1.45478000  | -0.45061400 |
| H | -1.10641200 | 1.35322200  | -1.53388900 |
| N | 0.49971200  | 0.53811000  | 1.35473900  |
| H | 1.47941000  | 0.25907100  | 1.28442800  |
| H | 0.08236100  | 0.00966900  | 2.11266400  |
| C | -1.00630300 | -0.99107700 | 0.13457900  |
| O | -0.99653000 | -1.85529700 | 0.98139700  |
| O | -1.87062900 | -1.09512000 | -0.93622300 |
| H | -2.28917800 | -1.96266500 | -0.84285400 |
| O | -2.25715200 | 1.67478200  | 0.17141200  |
| H | -2.82534700 | 0.95076800  | -0.11212300 |
| H | 3.70220100  | 1.00821400  | 0.56279900  |
| H | 0.62071000  | 0.05650000  | -0.68828000 |
| O | 3.54170400  | 0.06055000  | 0.56447000  |
| H | 3.04041500  | -0.11054200 | -0.34471400 |
| H | 2.52000400  | 0.02268500  | -2.35969000 |
| O | 2.15852500  | -0.28931300 | -1.52498500 |
